1 **Ribosome profiling reveals post-translational signaling mechanisms drive the retrograde**  
2 **enhancement of presynaptic efficacy**

3

4 Xun Chen<sup>1,2</sup> and Dion K. Dickman<sup>1,\*</sup>

5

6 <sup>1</sup>Department of Neurobiology, University of Southern California, Los Angeles, CA

7 <sup>2</sup>USC Neuroscience Graduate Program

8

9

10 Keywords: Ribosome profiling, RNA-seq, synaptic homeostasis, *Drosophila*, neuromuscular  
11 junction

12

13 Running title: Ribosome profiling in *Drosophila*

14

15 \*Correspondence:

16 Dion Dickman

17 Department of Neurobiology

18 University of Southern California

19 Los Angeles, CA 90089

20 Phone: (213) 740-7533

21 Fax: (877) 518-2393

22 dickman@usc.edu

23

24

25

26

27 **ABSTRACT**

28 Presynaptic efficacy can be modulated by retrograde control mechanisms, but the nature of  
29 these complex signaling systems remain obscure. We have developed and optimized a tissue-  
30 specific ribosome profiling approach in *Drosophila*. We first demonstrate the ability of this  
31 technology to define genome-wide translational regulations. We then leverage this technology to  
32 test the relative contributions of transcriptional, translational, and post-translational mechanisms  
33 in the postsynaptic muscle that orchestrate the retrograde control of presynaptic function.  
34 Surprisingly, we find no changes in transcription or translation are necessary to enable  
35 retrograde homeostatic signaling. Rather, post-translational mechanisms appear to ultimately  
36 gate instructive retrograde communication. Finally, we find that a global increase in translation  
37 induces adaptive responses in both transcription and translation of protein chaperones and  
38 degradation factors to promote cellular proteostasis. Together, this demonstrates the power of  
39 ribosome profiling to define transcriptional, translational, and post-translational mechanisms  
40 driving retrograde signaling during adaptive plasticity.

41

42

43

44

45

46

47

48

49

50

51

52

53 **AUTHOR SUMMARY**

54 Recent advances in next-generation sequencing approaches have revolutionized our  
55 understanding of transcriptional expression in diverse systems. However, transcriptional  
56 expression alone does not necessarily report gene translation, the process of ultimate  
57 importance in understanding cellular function. To circumvent this limitation, biochemical tagging  
58 of ribosomes and isolation of ribosomally-associated mRNA has been developed. However, this  
59 approach, called TRAP, has been shown to lack quantitative resolution compared to a superior  
60 technology, ribosome profiling, which quantifies the number of ribosomes associated with each  
61 mRNA. Ribosome profiling typically requires large quantities of starting material, limiting  
62 progress in developing tissue-specific approaches. Here, we have developed the first tissue-  
63 specific ribosome profiling system in *Drosophila* to reveal genome-wide changes in translation.  
64 We first demonstrate successful ribosome profiling from a specific tissue, muscle, with superior  
65 resolution compared to TRAP. We then use transcriptional and ribosome profiling to define  
66 transcriptional and translational adaptations necessary for synaptic signaling at the  
67 neuromuscular junction. Finally, we utilize ribosome profiling to demonstrate adaptive changes  
68 in cellular translation following cellular stress to muscle tissue. Together, this now enables the  
69 power of *Drosophila* genetics to be leveraged with translational profiling in specific tissues.

70

71

72

73

## 74 INTRODUCTION

75 Synapses have the capacity to adaptively modulate the efficacy of neurotransmission to  
76 maintain stable levels of functionality, counteracting perturbations that would otherwise impair  
77 communication in the nervous system. These robust homeostatic mechanisms stabilize synaptic  
78 strength in both the central and peripheral nervous systems, and have been demonstrated to  
79 exist in invertebrates to humans (Davis and Muller, 2015; Pozo and Goda, 2010; Turrigiano,  
80 2012). In each system, disruption of synaptic transmission leads to compensatory changes in  
81 postsynaptic receptor trafficking or presynaptic efficacy that restores baseline levels of activity  
82 (Davis, 2013; Turrigiano, 2008). The importance of homeostatic signaling is underscored by  
83 links with a variety of neurological and neuropsychiatric diseases, including epilepsy,  
84 schizophrenia, and autism (Meier et al., 2014; Nelson and Valakh, 2015; Wondolowski and  
85 Dickman, 2013). Although a perturbation to synaptic activity is clearly required for the induction  
86 of homeostatic synaptic plasticity, the mechanisms that respond to this perturbation to induce  
87 intrinsic and trans-synaptic homeostatic signaling remain largely unknown.

88         The *Drosophila* neuromuscular junction (NMJ) has been established as a powerful  
89 system to reveal the genes and mechanisms involved in the homeostatic control of synaptic  
90 strength (Frank, 2014; Frank et al., 2006; Petersen et al., 1997). At this glutamatergic synapse,  
91 genetic or pharmacological perturbations that disrupt postsynaptic neurotransmitter receptors  
92 induce a retrograde signaling system that ultimately potentiates presynaptic release, restoring  
93 baseline levels of synaptic transmission (Frank et al., 2006; Haghghi et al., 2003; Petersen et  
94 al., 1997). Specifically, reduction in the amplitude of miniature excitatory postsynaptic potentials  
95 (mEPSPs) are observed in response to loss of the GluRIIA subunit (Fig. 1A). However,  
96 excitatory postsynaptic receptor amplitude (EPSP) is maintained at wild-type levels due to an  
97 enhancement in the number of synaptic vesicles released (quantal content). This process is  
98 referred to as presynaptic homeostatic potentiation (PHP) because the expression mechanism  
99 of this form of plasticity is a presynaptic increase in neurotransmitter release. Recent forward



100 genetic screening and candidate approaches have revealed the identity of several genes and  
101 effector mechanisms in the presynaptic neuron required for the homeostatic potentiation of  
102 presynaptic release (Dickman and Davis, 2009; Dickman et al., 2012; Frank et al., 2009; Genc  
103 et al., 2017; Harris et al., 2015; Kiragasi et al., 2017; Muller and Davis, 2012; Muller et al., 2015;  
104 Muller et al., 2012; Muller et al., 2011; Tsurudome et al., 2010; Wang et al., 2016; Younger et  
105 al., 2013). However, in contrast to our understanding of the genes and mechanisms involved in  
106 PHP expression in the presynaptic neuron, very little is known about the postsynaptic signaling  
107 system that transduces a reduction in glutamate receptor function into a retrograde signal that  
108 instructs an adaptive increase in presynaptic release.

109 Modulation of protein synthesis through the Target of Rapamycin (Tor) pathway was  
110 recently implicated in the postsynaptic signaling system controlling PHP. Genetic loss of the  
111 postsynaptic glutamate receptor subunit *GluRIIA* at the *Drosophila* NMJ leads to a chronic  
112 reduction in postsynaptic excitability, but normal synaptic strength due to a homeostatic  
113 increase in presynaptic release (Petersen et al., 1997). However, pharmacologic or genetic  
114 inhibition of postsynaptic protein synthesis through the Tor pathway and associated translational  
115 modulators disrupts the expression of PHP (Kauwe et al., 2016; Penney et al., 2012; Penney et  
116 al., 2016). Further, a constitutive increase in muscle protein synthesis through postsynaptic  
117 overexpression of Tor was sufficient to trigger the retrograde enhancement of presynaptic  
118 release without any perturbation to glutamate receptors (Penney et al., 2012; Penney et al.,  
119 2016). While these results establish some of the first insights into the postsynaptic signal  
120 transduction system controlling retrograde PHP signaling, the putative translational targets  
121 involved, and to what extent transcriptional and/or post-translational mechanisms contribute to  
122 PHP signaling, remain unknown.

123 Recent advances in next-generation sequencing have enabled the ability to quantify  
124 genome-wide changes in RNA expression, without pre-existing knowledge, at unprecedented  
125 resolution (Chen et al., 2016; Ozsolak and Milos, 2011; Wang et al., 2009). In addition,

126 biochemical tagging of ribosomes has emerged as a powerful way to separate and define the  
127 actively translating mRNA pool from overall mRNA expression (Chen and Rosbash, 2017;  
128 Heiman et al., 2008; Huang et al., 2013; Sanz et al., 2009; Thomas et al., 2012; Yang et al.,  
129 2005; Zhang et al., 2016), a technique termed TRAP (Translating Ribosome Affinity Purification)  
130 followed by RNA-seq. Although this approach provides important insights into translational  
131 regulation, it lacks the resolution to differentiate between mRNA populations associated with few  
132 or high numbers of ribosomes, a distinction that can have major consequences for accurately  
133 defining translational rates (Chekulaeva and Landthaler, 2016; Heiman et al., 2014). This  
134 limitation was recently overcome through the development of a technique called “ribosome  
135 profiling”, which quantifies only mRNA fragments that are protected by ribosomes (“ribosome  
136 footprints”). This enables the quantitative analysis of the number of ribosomes associated with  
137 each mRNA transcript, and is even capable of defining regions within RNA transcripts of  
138 ribosome association (Ingolia, 2016; Ingolia et al., 2009; Li et al., 2014). This technology has  
139 been used to reveal genome-wide adaptations to translation that would not have been observed  
140 from transcriptional or translational profiling (TRAP) approaches alone (Cho et al., 2015; Dunn  
141 et al., 2013; Gonzalez et al., 2014; Ingolia et al., 2009; Ingolia et al., 2011; Jeong et al., 2016).  
142 However, despite the potential of ribosome profiling, this approach has not been developed for  
143 tissue-specific applications in *Drosophila*, nor brought to the study of retrograde homeostatic  
144 signaling.

145         We have developed and optimized a streamlined system for ribosome profiling of  
146 specific tissues in *Drosophila*. We first demonstrate the success of this approach in defining  
147 translational regulation in the larval muscle, and reveal dynamics in translation that are distinct  
148 from overall transcriptional expression. Next, we highlight the superior sensitivity of ribosome  
149 profiling in reporting translational regulation over the conventional TRAP method. We go on to  
150 use ribosome profiling to assess the contributions of transcriptional, translational, and post-  
151 translational mechanisms in the postsynaptic muscle that drive the retrograde signaling system

152 underlying presynaptic homeostatic potentiation. Unexpectedly, we find no changes in  
153 postsynaptic transcription or translation following PHP signaling. Instead, post-translational  
154 mechanisms appear to be necessary, which can transform an overall increase in cellular  
155 translation into a specific, instructive retrograde signal. Finally, our analysis also revealed  
156 adaptive changes in both transcription and translation in the postsynaptic cell in response to  
157 chronically elevated Tor-mediated translation, including increased expression of protein  
158 chaperones, ubiquitin ligases, and ribosome biogenesis factors. Thus, we have established a  
159 tissue-specific ribosome profiling approach in *Drosophila* and used it to define transcriptional,  
160 translational, and post-translational contributions to retrograde signaling during synaptic  
161 plasticity.

162

## 163 **RESULTS**

### 164 **A strategy to profile postsynaptic transcription and translation adaptations that drive** 165 **retrograde PHP signaling**

166 To assess the postsynaptic retrograde signaling systems that drive presynaptic homeostatic  
167 potentiation (PHP) at the *Drosophila* NMJ, we focused on three genetic conditions (Fig. 1A).  
168 First is the wild-type control genotype ( $w^{1118}$ ), which serves as the control condition in which  
169 PHP is not induced or expressed. Second, null mutations in the postsynaptic glutamate receptor  
170 subunit *GluRIIA* (*GluRIIA*<sup>SP16</sup>) lead to a chronic reduction in mEPSP amplitude (Petersen et al.,  
171 1997). However, EPSP amplitudes are maintained at wild-type levels due to a homeostatic  
172 increase in presynaptic release (quantal content) following retrograde signaling from the muscle  
173 (Fig. 1A-D). This serves as one condition in which we hypothesized that gene transcription,  
174 translation, and/or post-translational changes may have occurred in response to loss of *GluRIIA*,  
175 triggering the induction of retrograde signaling that drives PHP. Indeed, in *GluRIIA* mutants,  
176 genetic disruption of the translational regulator *Target of rapamycin* (*Tor*) blocks PHP  
177 expression, resulting in no change in quantal content and a concomitant reduction in EPSP

178 amplitude (Penney et al., 2012). Finally, postsynaptic overexpression of *Tor* in an otherwise  
179 wild-type muscle (*Tor*-OE: *UAS-Tor-myc/+;BG57-Gal4/+*) is sufficient to trigger PHP signaling,  
180 leading to increased presynaptic release and EPSP amplitude with no change in mEPSP or  
181 glutamate receptors (Fig. 1A-D; (Penney et al., 2012)). *Tor*-OE therefore served as the final  
182 genotype in which PHP signaling was induced through *Tor* overexpression without any  
183 perturbation of postsynaptic glutamate receptors. We hypothesized that shared changes in  
184 translation, and perhaps even transcription, between *GluRIIA* mutants and *Tor*-OE would  
185 illuminate the nature of the postsynaptic transduction system underlying homeostatic retrograde  
186 signaling at the *Drosophila* NMJ.

187 To define genome-wide changes in mRNA transcription and translation in the  
188 postsynaptic muscle that may be necessary for PHP signaling, we sought to purify RNA from 3<sup>rd</sup>  
189 instar larvae muscle in wild type, *GluRIIA* mutants, and *Tor*-OE (Fig. 1E). We then sought to  
190 define mRNA expression through three methods: Transcriptional profiling, translational profiling  
191 using translating ribosome affinity purification (TRAP), and ribosome profiling (Fig. 1F). First,  
192 transcriptional profiling of total mRNA expression can be performed by isolating RNA from  
193 dissected third instar muscle and prepared for RNA-seq through standard methods (Brown et  
194 al., 2014; Mortazavi et al., 2008). To define translational changes, we engineered an affinity tag  
195 on a ribosome subunit under control of the upstream activating sequence (*UAS*), which enables  
196 tissue-specific expression (Fig. 1E). This biochemically tagged ribosome could therefore be  
197 expressed in muscle to purify ribosomes, then processed to sequence only mRNA sequences  
198 associated with or protected by ribosomes (Fig. 1F). Affinity tagging of ribosomes enabled us to  
199 perform translational profiling (TRAP: Translating Ribosome Affinity Purification), an established  
200 technique capable of detecting ribosome-associated mRNA (Chen and Rosbash, 2017; Heiman  
201 et al., 2014; Heiman et al., 2008; Huang et al., 2013; Zhang et al., 2016). Finally, we reasoned  
202 that this approach could be optimized to enable ribosome profiling, which has been used  
203 successfully to determine changes in translational rates, with superior sensitivity over TRAP, in

204 a variety of systems (Dunn et al., 2013; Ingolia et al., 2009; Ingolia et al., 2011; Jeong et al.,  
205 2016). However, ribosome profiling has not been developed for use in specific *Drosophila*  
206 tissues. Our next objective was to optimize a tissue-specific ribosome profiling approach.

207

### 208 **Optimization of a tissue-specific ribosome profiling approach in *Drosophila***

209 Ribosome profiling is a powerful approach for measuring genome-wide changes in mRNA  
210 translation rates. However, high quantities of starting material is necessary to obtain sufficient  
211 amounts of ribosome protected mRNA fragments for the subsequent processing steps involved  
212 (Brar and Weissman, 2015). Since this approach has not been developed for *Drosophila*  
213 tissues, we first engineered and optimized the processing steps necessary to enable highly  
214 efficient affinity purification of ribosomes and ribosome protected mRNA fragments by  
215 incorporating ribosome affinity purification into the ribosome profiling protocol.

216 Although tissue-specific ribosome affinity purification strategies have been developed  
217 before in *Drosophila* (Thomas et al., 2012; Zhang et al., 2016), these strategies have not been  
218 optimized to meet the unique demand necessary for ribosome profiling. We thus set out to  
219 develop and optimize a new ribosome affinity purification strategy that enables the efficient  
220 purification and processing of ribosomally-protected mRNA. First, we generated transgenic  
221 animals that express a core ribosome subunit in frame with a biochemical tag (*3xFlag*) under  
222 *UAS* control to enable expression of this transgene in specific *Drosophila* tissues (Fig. 1E and  
223 2A). Although previous approaches in *Drosophila* have targeted the same ribosome subunit  
224 (RpL10a) with different tags (Huang et al., 2013; Thomas et al., 2012; Zhang et al., 2016), we  
225 found these to be sub-optimal for the efficiency necessary for ribosome profiling (data not  
226 shown). Therefore, based on high resolution crystal structures of eukaryotic ribosomes (Ben-  
227 Shem et al., 2011; Khatter et al., 2015), we selected an alternative ribosomal protein from the  
228 large and small subunits expected to have C terminals exposed on the ribosome surface. We  
229 cloned the *Drosophila* homologs of these subunits, *RpL3* and *RpS13*, in frame with a C-terminal

230 *3xFlag* tag and inserted this sequence into the pACU2 vector for high expression under *UAS*  
231 control (Han et al., 2011). We then determined whether intact ribosomes could be isolated in  
232 muscle tissue following expression of the tagged ribosomal subunit. We drove expression of  
233 *UAS-RpL3-Flag* or *UAS-RpS13-Flag* with a muscle-specific *Gal4* driver (*BG57-Gal4*) and  
234 performed anti-Flag immunoprecipitations (Fig. 2A). An array of specific bands were detected in  
235 a Commassie stained gel from the RpL3-Flag and RpS13-Flag immunoprecipitations, but no  
236 such bands were observed in lysates from wild type (Fig. 2B). Importantly, identical sized bands  
237 were observed in immunoprecipitates from both RpL3-Flag and RpS13-Flag animals, matching  
238 the expected distribution of ribosomal proteins (Anger et al., 2013). The RPL3-Flag  
239 immunoprecipitation showed the same distribution as RpS13 but higher band intensity,  
240 indicating higher purification efficiency, so we used *RpL3-Flag* transgenic animals for the  
241 remaining experiments. In addition to ribosomal proteins, the other major constituent of intact  
242 ribosomes is ribosomal RNA. Significant amounts of ribosomal RNA were detected in an  
243 agarose gel from RpL3-Flag immunoprecipitates (Fig. 2C), providing additional independent  
244 evidence that this affinity purification strategy was efficient at purifying intact ribosomes.

245         Next, we tested the ability of RpL3-Flag to functionally integrate into intact ribosomes.  
246 We generated an *RpL3-Flag* transgene under control of the endogenous promoter (*genomic-*  
247 *RpL3-Flag*; Fig. S1A). This transgene was able to rescue the lethality of homozygous *RpL3*  
248 mutations (Fig. S1A), demonstrating that this tagged ribosomal subunit can integrate and  
249 function in intact endogenous ribosomes, effectively replacing the endogenous untagged RpL3  
250 protein. Further, anti-Flag immunostaining of *UAS-RpL3-Flag* expressed in larval muscle  
251 showed a pattern consistent with expected ribosome distribution and localization (Fig. S1B).  
252 Thus, biochemical tagging of RpL3 does not disrupt its localization or ability to functionally  
253 integrate into endogenous ribosomes.

254         Finally, we developed and optimized a method to process the isolated ribosomes to  
255 generate only ribosome protected mRNA fragments to be used for RNA-seq analysis. First, we

256 digested the tissue lysate with RNaseT1, an enzyme that cuts single stranded RNA at G  
257 residues (Fig. 2D). Following digestion, we ran RNA on a high percentage PAGE gel, excising  
258 the mRNA fragments protected from digestion by ribosome binding (30-45 nucleotides in length;  
259 Fig. 2D). Sequencing of this pool of RNA demonstrated that the vast majority of reads mapped  
260 to the 5'UTR and coding regions of mRNA transcripts, with very few reads mapping to the  
261 3'UTR of mRNA transcripts (Fig. 2E), where ribosomes are not expected to be associated. This  
262 coverage map also revealed heterogeneous distributions on mRNA transcripts with irregular  
263 and prominent peaks, as expected, which are indicative of ribosome pause sites on mRNA (Fig.  
264 2E; (Li et al., 2012)). In contrast, RNA-seq reads for transcriptional and translational profiling  
265 using TRAP mapped to the entire mRNA transcript with relatively even coverage (Fig. 2E).  
266 Importantly, replicate experiments demonstrated that this protocol generated highly reproducible  
267 measures of relative protein synthesis rates, defined by mRNA ribosome density, or the number  
268 of ribosome profiling Reads Per Kilobase of exon per Million mapped reads (RPKM, also  
269 referred to as ribosome profiling expression value; Fig. 2F). Thus, expression of *RpL3-Flag*  
270 enables the purification of ribosomes from specific tissues in *Drosophila*, and further processing  
271 reproducibly generates ribosome protected mRNA fragments, which correlate with protein  
272 synthesis rates (Li et al., 2014).

273

### 274 **Ribosome profiling is more sensitive in detecting translational regulation compared to** 275 **translational profiling (TRAP)**

276 Translation can differ in significant ways from overall transcriptional expression through  
277 modulations in the degree of ribosome association with each mRNA transcript, in turn  
278 suppressing or enhancing protein synthesis rates (Chekulaeva and Landthaler, 2016; Kong and  
279 Lasko, 2012). Translation efficiency is a measure of these differences, defined as the ratio of  
280 translational to transcriptional expression (Ingolia et al., 2009). Hence, translation efficiency (TE)  
281 reflects the enhancement or suppression of translation relative to transcriptional expression due



282 to various translational control mechanisms (Jackson et al., 2010; Kong and Lasko, 2012).  
283 Although both translational (TRAP) and ribosome profiling approaches can report TE, ribosome  
284 profiling should, in principle, exhibit superior sensitivity in revealing translational dynamics. We  
285 therefore compared translational and ribosome profiling directly to test this prediction.

286 We compared translation efficiency by comparing TRAP and ribosome profiling to  
287 transcriptional profiling in wild-type muscle. In particular, we tested whether differences were  
288 apparent in the number of genes revealed to be translationally suppressed or enhanced relative  
289 to transcriptional level through ribosome profiling compared to TRAP. We first analyzed the  
290 extent to which ribosome profiling and TRAP measurements correlate with transcriptional  
291 profiling by plotting the ribosome profiling and TRAP expression values as a function of  
292 transcriptional profiling (Fig. 3A,B; see materials and methods). A low correlation would indicate  
293 more translational regulation is detected, while a high correlation is indicative of less  
294 translational regulation. This analysis revealed a low correlation between ribosome profiling and  
295 transcriptional profiling (correlation of determination  $r^2=0.100$ ; Fig. 3A), while a relatively high  
296 correlation was observed between TRAP and transcriptional profiling ( $r^2=0.617$ ; Fig. 3B).  
297 Further, we subdivided all measured genes into three categories: high TE, medium TE, and low  
298 TE. These groups were based on translation efficiency as measured by ribosome profiling or  
299 TRAP, with high TE genes having a TE value  $>2$ , representing genes that are translationally  
300 enhanced relative to transcriptional level; low TE genes having a TE value  $<0.5$ , representing  
301 genes translationally suppressed relative to transcriptional level; and medium TE genes having  
302 a TE between 0.5 and 2; representing genes not under strong translational regulation. This  
303 division revealed a higher number of genes in the high and low TE groups detected by ribosome  
304 profiling compared to TRAP (Fig. 3C). Together, these results are consistent with ribosome  
305 profiling detecting more genes under translational regulation compared to TRAP.

306 We next investigated the genes under significant translational regulation (genes with  
307 high TE or low TE), detected through either ribosome profiling or TRAP, to determine whether



308 differences exist in the amplitude of translational regulation. Specifically, genes were divided  
309 into the three categories mentioned above based on the average translation efficiency  
310 measured by ribosome profiling and TRAP. We then determined the TE value ratio from  
311 ribosome profiling compared to TRAP within the three categories. A ratio above 0 (log<sub>2</sub>  
312 transformed) in the high TE group indicates a more sensitive reporting of translation for  
313 ribosomal profiling, while a ratio below 0 in the low TE group would also indicate superior  
314 sensitivity for the ribosomal profiling approach. This investigation revealed an average ratio of  
315 0.28 within the high TE group, -0.15 within the medium TE group, and -1.25 within the low TE  
316 group (Fig. 3D). This analysis demonstrates that ribosome profiling is at least 22% more  
317 sensitive in detecting high TE, and 138% more sensitive in detecting low TE in comparison to  
318 TRAP. Thus, this characterization demonstrates that ribosome profiling provides a more  
319 sensitive and quantitative measurement of translational regulation in comparison to TRAP,  
320 validating this approach.

321

### 322 **Transcriptional and ribosome profiling reveals dynamic translational regulation in** 323 ***Drosophila* muscle**

324 Both subtle and dramatic differences have been observed in rates of mRNA translation relative  
325 to transcription, particularly during cellular responses to stress (Dunn et al., 2013; Halbeisen  
326 and Gerber, 2009; Spriggs et al., 2010). Having optimized and validated our approach, we went  
327 to perform transcriptional and ribosome profiling in *GluRIIA* mutants and Tor-OE in addition to  
328 wild type (Table S1). To minimize genetic variation, the three genotypes were bred into an  
329 isogenic background, and three replicate experiments were performed for each genotype (see  
330 materials and methods). We first determined the total number of genes expressed in *Drosophila*  
331 muscle, as assessed through both transcription and ribosome profiling. The fly genome is  
332 predicted to encode 15,583 genes (NCBI genome release 5\_48). We found 6,835 genes to be  
333 expressed in wild-type larval muscle through transcriptional profiling, and a similar number

334 (6,656) through ribosome profiling (Fig. 4A), with ~90% of transcripts being shared between the  
335 two lists (Table S2), indicating that the vast majority of transcribed genes are also translated.  
336 We found no significant differences in the size of the transcriptome and translome between  
337 wild type, *GluRIIA* mutants, and Tor-OE (Table S2). We then compared the muscle  
338 transcriptome to a published transcriptome from the central nervous system (CNS) of third-  
339 instar larvae (Brown et al., 2014). This comparison revealed dramatic differences in gene  
340 expression between the two tissues (Fig. 4B). In particular, we found several genes known to be  
341 enriched in muscle, including *myosin heavy chain*,  *$\alpha$  actinin*, and *zasp52*, to be significantly  
342 transcribed and translated in muscle, as expected. In contrast, neural-specific genes such as  
343 the active zone scaffold *bruchpilot*, the post-mitotic neuronal transcription factor *elav*, and the  
344 microtubule associated protein *tau*, were highly expressed in the CNS but not detected in  
345 muscle (Table S3 and data not shown). Together, this demonstrates that the muscle  
346 transcriptome and translome can be defined by the transcriptional and ribosome profiling  
347 strategy we developed with high fidelity.

348         Next, we investigated genome wide translation efficiency distribution in larval muscle,  
349 and compared this with gene expression as assessed through transcriptional and ribosome  
350 profiling. We first calculated translation efficiency for all genes expressed in larval muscle and  
351 compared heat maps of TE to heat maps of the transcription and translation level (Fig. 4C). This  
352 revealed a dynamic range of translation efficiency, and a surprising trend of genes with high TE  
353 displaying relatively low transcriptional expression levels, while genes with low TE exhibited  
354 high transcriptional expression levels (Fig. 4C). We then analyzed the genes categorized as  
355 high TE, medium TE and low TE (described above) in more detail, comparing the relative  
356 distribution in transcriptional expression. We found this trend to be maintained, in that high TE  
357 genes exhibited significantly lower transcriptional expression, while low TE genes were  
358 significantly higher in transcriptional expression (Fig. 4D). Together, this implies a general  
359 inverse correlation between translational efficiency and transcriptional expression.

360 Finally, we examined the genes with the most extreme translation efficiency to gain  
361 insight into the functional classes of genes that exhibit strong translational control under basal  
362 conditions. Interestingly, among the genes with most suppressed translation (100 genes with  
363 the lowest translation efficiency), we found a surprisingly high enrichment of genes encoding  
364 ribosome subunits and translation elongation factors (Fig. 4E,F; Fig. S2A and Table S3).  
365 Indeed, 73 of the 100 genes with the lowest translation efficiency were ribosome subunits, with  
366 all subunits exhibiting a consistently low TE, averaging 0.091. In contrast, *RpL3*, the subunit we  
367 overexpressed (*UAS-RpL3-Flag*), was a clear outlier compared with the other ribosome  
368 subunits, as expected, showing a translation efficiency of 2.85. This overall suppression in TE of  
369 ribosome subunits may enable a high dynamic regulatory range, enabling a rapid increase in  
370 production of ribosomal proteins under conditions of elevated protein synthesis. Consistent with  
371 this idea, we observed a coordinated upregulation of translation efficiency for ribosomal  
372 subunits when overall muscle translation is elevated in Tor-OE (Fig. 4H). This is in agreement  
373 with previous findings showing ribosome subunits and translation elongation factors as targets  
374 for translational regulation by Tor (Jefferies et al., 1994; Thomas et al., 2012). In contrast to the  
375 enrichment of ribosome subunits observed in the low TE group, diverse genes were found  
376 among the most translationally enhanced group, with genes involved in cellular structure being  
377 the most abundant (Fig. 4E,G; Fig. S2B and Table S4). These genes may encode proteins with  
378 high cellular demands, being translated at high efficiency. Indeed, counter to what was  
379 observed in genes with low TE, genes with high TE showed no significant change in TE  
380 following Tor-OE (Fig. 4H). Together, this analysis reveals that translation differs in dramatic  
381 ways from overall transcriptional expression, reflecting a highly dynamic translational landscape  
382 in the muscle.

383

384 **Transcriptional and ribosome profiling confirms expected changes in *GluRIIA* mutants**  
385 **and Tor-OE**

386 We next confirmed the fidelity of our transcriptional and ribosome profiling approach by  
387 examining in molecular genetic detail the two manipulations we utilized to trigger postsynaptic  
388 retrograde signaling. The *GluRIIA*<sup>SP16</sup> mutation harbors a 9 kb deletion that removes the first half  
389 of the *GluRIIA* locus as well as the adjacent gene, *oscillin* (Fig. 5A; (Petersen et al., 1997)).  
390 Analysis of both transcriptional and ribosome profiling of *GluRIIA*<sup>SP16</sup> mutants revealed no  
391 transcription or translation of the deleted region, as expected (Fig. 5B). Transcription and  
392 translation of the adjacent gene, *oscillin*, was also negligible (wild type vs. *GluRIIA*:  
393 transcription=15.9 vs. 0.08 RPKM; translation=9.8 vs. 0.4 RPKM). However, the 3' portion of the  
394 *GluRIIA* coding region was still transcriptionally expressed in *GluRIIA* mutants, while a  
395 significant reduction in translation was observed by ribosome profiling (Fig. 5B). Together, this  
396 confirms that although the residual 3' region of the *GluRIIA* locus was transcribed, likely through  
397 an adjacent promoter, this transcript was not efficiently translated. Indeed, the peak ribosome  
398 profiling signals, which represent ribosome pause sites on the mRNA transcript, is known to be  
399 conserved for specific open reading frames (Li et al., 2012). However, this pattern was altered in  
400 *GluRIIA* mutants compared to wild type (Fig. 5B), suggesting the translation of the residual 3'  
401 region of *GluRIIA* in *GluRIIA*<sup>SP16</sup> mutants was not in the same reading frame as the intact  
402 transcript. Thus, both transcriptional and ribosome profiling confirms that *GluRIIA* expression is  
403 abolished in *GluRIIA*<sup>SP16</sup> mutants.

404 Finally, we examined the expression of endogenous (genomic) and transgenically  
405 overexpressed (UAS) *Tor* through transcriptional and ribosome profiling. While both  
406 endogenous *Tor* and *UAS-Tor* mRNA share the same coding region, the 5'UTR and 3'UTR  
407 regions differ between these transcripts (Fig. 5C), enabling us to distinguish expression  
408 between these transcripts. We first confirmed a large increase in *Tor* coding region expression  
409 through both transcriptional profiling (68-fold) and ribosome profiling (1200 fold) (Fig. 5C, black).  
410 In contrast, analysis of the 5' and 3' UTRs revealed very little difference in endogenous *Tor*  
411 expression in *UAS-Tor* compared to wild type (Fig. 5C, grey), while a dramatic increase in both

412 transcription (125-fold) and translation (1200-fold) was observed (Fig. 5C, red). Indeed, the  
413 translation efficiency of *Tor* was increased 14 fold in Tor-OE, consistent with the known  
414 influences of engineered 5'UTR and 3'UTR sequences in promoting translation in *UAS*  
415 constructs (Brand and Perrimon, 1993). Together, these experiments demonstrate that both  
416 transcriptional and ribosome profiling reliably report the expected changes in transcription and  
417 translation in the *Drosophila* larval muscle, and further serve to validate this approach.

418

### 419 **Transcriptional and ribosome profiling reveals post-translational mechanisms drive** 420 **retrograde signaling**

421 Given the substantial evidence that Tor-mediated control of new protein synthesis in the  
422 postsynaptic cell is necessary for retrograde PHP signaling (Penney et al., 2012), we compared  
423 transcriptional and translational changes in muscle between wild type, *GluRIIA* mutants, and  
424 Tor-OE. We anticipated a relatively small number of transcriptional changes, if any, between  
425 these genotypes, while we hypothesized substantial differences in translation rates would be  
426 observed both *GluRIIA* mutants and Tor-OE. The elevated translation of this exceptional subset  
427 of targets would, we anticipated, initiate postsynaptic PHP signaling and lead to an instructive  
428 signal that drives the retrograde enhancement in presynaptic release. Alternatively, we also  
429 considered the possibility that Tor-mediated protein synthesis may act in a non-specific manner,  
430 increasing overall protein synthesis in the postsynaptic cell, while there would be no overlap in  
431 translational changes between *GluRIIA* mutants and Tor-OE. In this case, post-translational  
432 mechanisms would operate on a global elevation in protein expression in Tor-OE, sculpting the  
433 proteome into an instructive retrograde signal. Indeed, the acute pharmacological induction and  
434 expression of PHP does not require new protein synthesis (Frank et al., 2006), providing some  
435 support for this model. We therefore compared transcription and translation in wild type, *GluRIIA*  
436 mutants, and Tor-OE.

437 We first compared transcription and translation in *GluRIIA* mutants and Tor-OE relative  
438 to wild type by plotting the measured expression values for each condition and determining the  
439 coefficient of determination,  $r^2$ . An  $r^2$  value equal to 1 indicates no difference between the two  
440 conditions, while a value of 0 implies all genes are differentially expressed. This analysis  
441 revealed a high degree of similarity between wild type and *GluRIIA* mutants in both transcription  
442 and translation, with  $r^2$  values above 0.98 (Fig. 6A). In contrast, a slightly larger difference exists  
443 in transcription between Tor-OE and wild type, with  $r^2=0.920$  (Fig. 6B). Although transcription  
444 should not be directly affected by Tor-OE, this implies that perhaps an adaptation in  
445 transcription was induced in the muscle in response to chronically elevated translation. Finally,  
446 translational differences were the largest between Tor-OE and wild type, with  $r^2=0.363$  (Fig. 6B).  
447 This global analysis demonstrates there are very few transcriptional and translational changes  
448 in *GluRIIA* compared to wild type, while moderate transcriptional and robust translational  
449 changes exist in Tor-OE.

450 In depth analysis of the transcriptome and translome in *GluRIIA* muscle revealed that  
451 no genes were significantly altered. In particular, we eliminated genes that were up- or down-  
452 regulated due to known or expected influences in the genetic background (*GluRIIA* and *oscillin*  
453 expression, and closely linked genes to this locus; see Materials and Methods). Even with a  
454 lowered threshold for significant expression changes (fold change more than 2.5, with adjusted  
455 p-value less than 0.05), there were surprisingly no significant differences in either transcription  
456 or translation between *GluRIIA* and wild type. Given that Tor-OE both induced retrograde PHP  
457 signaling and drove a large and non-specific increase in translation (Fig. 6B; (Thoreen et al.,  
458 2012)), we considered whether a global shift in overall translation, and not specific translational  
459 regulation of particular targets, occurred in *GluRIIA* mutants, similar to what was observed in  
460 Tor-OE. First, we confirmed a global shift in translation in Tor-OE compared to wild type, as  
461 expected given the role of Tor as a general regulator of Cap-dependent translation initiation  
462 (Saxton and Sabatini, 2017). We plotted a gene count histogram of Tor-OE versus wild type

463 measured by ribosome profiling, and overlaid the graph over a wild type over wild type ribosome  
464 profiling histogram. This analysis should indicate the relative degree of variation in translation  
465 between these groups. Indeed, a shift in global translation was observed in Tor-OE, with an  
466 average of 1.6 fold change in translation compared to 1.09 for wild type (Fig. 6C). This shift is  
467 significant when tested by Kolmogorov–Smirnov test ( $p < 0.001$ ) (Fig. 6D). We then performed  
468 this same analysis for *GluRIIA* vs WT. However, we observed no significant shift in translation in  
469 *GluRIIA* (0.97 fold change compared to 1.09; Fig. 6C). Thus, while Tor-OE induces a global  
470 increase in translation, loss of the *GluRIIA* receptor subunit in muscle does not measurably  
471 change overall translation.

472         Although no specific translational targets were identified to significantly change in  
473 *GluRIIA* mutants compared to wild type, we did identify 46 genes that exhibited significant  
474 increases in translation efficiency in Tor-OE (fold change more than 2, p-value less than 0.05)  
475 (Table S5). We characterized the expression of these genes in *GluRIIA* vs WT to determine  
476 whether a trend was observed that may differentiate the translational adaptations that drive  
477 retrograde PHP signaling in Tor-OE compared to the more general overall increase in protein  
478 synthesis. We therefore generated a heatmap of these 46 genes in Tor-OE vs WT and  
479 compared this to the same 46 genes in *GluRIIA* vs WT (Fig. 6E). This analysis revealed no  
480 particular trend or correlation in *GluRIIA* among the 46 genes with increased translation  
481 efficiency in Tor-OE (Fig. 6E). Together, these results suggest that retrograde signaling in the  
482 postsynaptic muscle, induced through loss of *GluRIIA*, does not alter translation of a specific  
483 subset of targets. In contrast, Tor-OE appears to induce a global increase in translation with no  
484 apparent specificity. This analysis indicates that while a similar retrograde enhancement in  
485 presynaptic release is induced by both loss of *GluRIIA* and Tor-OE, there is no overlap in  
486 translational targets, implying that post-translational mechanisms are ultimately required for  
487 retrograde homeostatic signaling.



488

489 **Chronic elevation in muscle protein synthesis leads to adaptive cellular responses**

490 Although Tor -OE should only exert direct impacts on cellular translation, our analysis above  
491 indicated that transcriptional changes are induced following the global increase in translation by  
492 Tor-OE (Fig. 6B). This suggested that adaptations in transcription, and perhaps also translation,  
493 may have been triggered in Tor-OE in response to the cellular stress imparted by the chronic,  
494 global increase in muscle protein synthesis. Indeed, proteome homeostasis (proteostasis) is  
495 under exquisite control (Kong and Lasko, 2012; Vogel and Marcotte, 2012), and sustained  
496 perturbations in Tor activity induces transcriptional programs that adaptively compensate to  
497 maintain proteostasis (Tiebe et al., 2015; Wullschleger et al., 2006; Zhang et al., 2014). We  
498 therefore reasoned that by examining the changes in transcription and translation induced by  
499 Tor-OE, we may gain insight into how a cell adapts to the stress of chronically elevated  
500 translation.

501 Transcriptional and ribosome profiling revealed 11 genes with significantly upregulated  
502 transcription (fold change>3 and adjusted p-value<0.05; Fig. 7A and Table S6), and 75 genes  
503 with significantly upregulated translation (fold change>3 and adjusted p-value<0.05; Fig. 7A and  
504 Table S6) in Tor-OE compared to wild type. Interestingly, 8 of these genes exhibited shared  
505 increases in both transcription and translation (Fig. 7A), with their translational fold change  
506 (revealed by ribosome profiling) being larger than would be expected by their transcriptional fold  
507 change alone. This suggests a coordinated cellular signaling system that adaptively modulates  
508 both transcription and translation in response to the global elevation in translation following  
509 overexpression of Tor in the muscle. Further analysis revealed these upregulated genes to  
510 belong to diverse functional classes (Fig. 7B). Notably, we observed a striking enrichment in  
511 heat shock proteins and chaperones, factors known to assist with protein folding and participate  
512 in the unfolded protein response, particularly during cellular stress (Bukau et al., 2006; Hetz,  
513 2012; Hohfeld et al., 2001; Romisch, 2005; Taipale et al., 2010). Indeed, among the 7 heat



514 shock protein genes with significant expression in the muscle (Table S6), 5 were significantly  
515 upregulated in translation and 3 were significantly upregulated in transcription, with the  
516 remaining 2 showing a strong trend towards upregulation (Fig. 7C,D and Table S6). Given the  
517 well documented role for heat shock proteins in regulating protein folding, stability, and  
518 degradation in conjunction with the proteasome system (Hohfeld et al., 2001; Romisch, 2005;  
519 Taipale et al., 2010), this adaptation likely contributes to the stabilization of elevated cellular  
520 protein levels resulting from Tor-OE. Thus, the coordinated upregulation of heat shock proteins  
521 is one major adaptive response in transcription and translation following Tor-OE.

522 In addition to heat shock proteins, we also identified genes involved in other cellular  
523 functions that are upregulated in Tor-OE and appear to enable adaptive responses to elevated  
524 cellular protein synthesis. For example, the E3 ubiquitin ligase subunit *APC4*, involved in protein  
525 degradation (Glickman and Ciechanover, 2002; Huang and Bonni, 2016), was upregulated in  
526 Tor-OE (Fig. 7E). Interestingly, proteasome subunits were reported to be upregulated in cells  
527 with increased Tor activity (Zhang et al., 2014). We also identified the RNA polymerase subunit  
528 *rpl1* and transcription factor *myc* to be upregulated following Tor-OE (Fig. 7F,G). These genes  
529 promote ribosome biogenesis, with Rpl1 necessary to synthesize ribosomal RNA and Myc  
530 involved in promoting the expression of ribosome assembly factors (van Riggelen et al., 2010;  
531 White, 2005). Together, Rpl1 and Myc likely promote the generation of additional ribosomes to  
532 meet the increased demands of protein synthesis induced by Tor-OE, consistent with previous  
533 studies showing Tor inhibition leads to decreased Rpl1 transcription (Mayer et al., 2004).  
534 Hence, transcriptional and ribosome profiling defined adaptations in gene expression and  
535 protein synthesis that maintain proteostasis following chronic elevation in protein synthesis.

536

## 537 **DISCUSSION**

538 We have developed a tissue-specific ribosome profiling strategy in *Drosophila* and used this  
539 approach to reveal the transcriptional and translational landscapes in larval muscle. This

540 revealed significant differences between overall transcriptional and translational expression, and  
541 illuminated specific classes of genes with suppressed or elevated translation rates relative to  
542 transcription. We went on to leverage this technology to define the transcriptional, translational,  
543 and post-translational influences in the postsynaptic muscle that drive the retrograde control of  
544 presynaptic efficacy. Unexpectedly, we found no evidence that specific changes in transcription  
545 or translation are necessary for retrograde signaling, indicating that post-translational  
546 mechanisms ultimately transform the loss of postsynaptic receptors and enhanced protein  
547 synthesis into instructive retrograde cues. Finally, we identified adaptive cellular responses, in  
548 both transcription and translation, to chronically elevated protein synthesis that promote protein  
549 stability. Together, this study demonstrates the power of ribosome profiling in *Drosophila*, and  
550 illuminates the complex interplay of transcription, translation, and post-translational mechanisms  
551 that adaptively modulate cellular proteome stability and trans-synaptic retrograde signaling.

552

### 553 **Ribosome profiling and translational regulation in *Drosophila***

554 We have developed a highly efficient affinity tagging strategy and optimized RNA processing to  
555 enable tissue-specific ribosome profiling in *Drosophila*. Ribosome profiling has major  
556 advantages over measuring total mRNA expression and ribosome-associated mRNA  
557 (translational profiling using TRAP). Profound differences can exist between transcriptional  
558 expression and actual protein synthesis of genes expressed in a tissue. RNA-seq of total mRNA  
559 (transcriptional profiling) does not capture translational dynamics (Liu et al., 2016; Mortazavi et  
560 al., 2008). Translational profiling using TRAP does provide insights into translation (Heiman et  
561 al., 2014), but is less sensitive in detecting translational dynamics compared to ribosome  
562 profiling, which accurately quantifies the number of ribosomes associated with mRNA  
563 transcripts (Fig. 3; (Ingolia et al., 2012)). One major obstacle that limited the development of  
564 tissue-specific ribosome profiling is the relatively large amount of starting material necessary to  
565 generate the library for next generation sequencing. Because only ~30 nucleotides of mRNA

566 are protected from digestion (Ingolia et al., 2009), ribosome profiling requires much more input  
567 material compared to standard RNA-seq (Brar and Weissman, 2015). Thus, the purification  
568 efficiency of the ribosome affinity tagging strategy and subsequent processing steps are very  
569 important to enabling successful profiling of ribosome protected mRNA fragments in *Drosophila*  
570 tissues. We achieved this high purification efficiency by systematically testing and optimizing  
571 multiple ribosome subunits (*RpL3*, *RpL36*, *RpS12*, *RpS13*) and affinity tags (6xHis, 1xFlag,  
572 3xFlag), finally settling on the *RpL3-3xFlag* combination to enable the highest purification  
573 efficiency (Fig. 2B and data not shown). Collectively, this effort differentiates our strategy from  
574 previous approaches in *Drosophila* that achieved ribosome profiling but lacked tissue specificity  
575 (Dunn et al., 2013) or purified ribosome-associated RNA from specific tissues but lacked the  
576 ability to quantify ribosome association with mRNA transcripts (Huang et al., 2013; Thomas et  
577 al., 2012; Yang et al., 2005; Zhang et al., 2016).

578         This optimized ribosome profiling approach has illuminated genome-wide translational  
579 dynamics in *Drosophila* muscle tissue and demonstrated two opposing protein production  
580 strategies utilized in these cells: elevated transcriptional expression coupled with low translation  
581 efficiency, which was apparent for genes encoding ribosomal subunits (Fig. 4F), and low  
582 transcriptional expression coupled with high translation efficiency, which was observed for  
583 genes encoding proteins belonging to diverse functional classes (Fig. 4G). These  
584 complementary strategies are likely tailored towards different cellular needs, enabling  
585 modulatory control of nuclear gene expression and cytosolic protein synthesis (Chekulaeva and  
586 Landthaler, 2016; Kong and Lasko, 2012). Thus, transcriptional and ribosome profiling of  
587 muscle tissue has revealed that translational control of ribosomal protein synthesis may be a  
588 phenomenon tailored to the unique metabolic needs of this tissue.

589

590 **Transcriptional, translational, and post-translational mechanisms required for retrograde**  
591 **synaptic signaling**

592 We have used transcriptional and translational profiling to determine the contributions of  
593 transcriptional, translational, and post-translational mechanisms in the postsynaptic signaling  
594 system that drives the retrograde enhancement of presynaptic efficacy. Strong evidence has  
595 suggested that protein synthesis is modulated during homeostatic signaling at the *Drosophila*  
596 NMJ, with genetic disruption of *Tor*-mediated protein synthesis blocking expression and  
597 activation of the *Tor* pathway triggering expression (Kauwe et al., 2016; Penney et al., 2012;  
598 Penney et al., 2016). However, no specific translational targets in the muscle have been  
599 identified. We had expected that translational profiling would discover targets with increased  
600 translation efficiency in the muscles of *GluRIIA* mutants and/or following postsynaptic *Tor*  
601 overexpression, genetic conditions in which presynaptic homeostatic plasticity is chronically  
602 activated. However, no specific changes in transcription or translation were observed in *GluRIIA*  
603 mutants, while almost all muscle genes increased in translation following *Tor*-OE (Fig. 6). This  
604 implies that post-translational mechanisms ultimately drive PHP signaling in *GluRIIA* mutants.  
605 Furthermore, an apparent global increase in translation of nearly every gene also appears  
606 sufficient to instruct enhanced presynaptic release, consistent with the translational regulators  
607 implicated in PHP (*Tor*, S6 Kinase, eIF4E, and LRRK2), being non-specific cap-dependent  
608 translational regulators (Jackson et al., 2010; Penney et al., 2012; Penney et al., 2016). We  
609 consider several possible explanations and implications of these findings.

610         There are three conditions that trigger homeostatic retrograde signaling in the  
611 postsynaptic muscle: Acute pharmacological blockade of *GluRIIA*-containing postsynaptic  
612 receptors (Frank et al., 2006), genetic mutations in *GluRIIA* (Petersen et al., 1997), and chronic  
613 overexpression of *Tor* (Penney et al., 2012). First, all three manipulations lead to a similar  
614 enhancement in presynaptic release, and no additional increase in release was observed in  
615 *GluRIIA* mutants combined with *Tor*-OE (Penney et al., 2012). This indicates that these three  
616 perturbations may utilize the same signaling system; however, there is also evidence that post-  
617 translational mechanisms are necessary for PHP signaling. Indeed, the acute pharmacological

618 induction of PHP does not require new protein synthesis (Frank et al., 2006), implying that if  
619 these manipulations use shared signal transduction and/or ultimately converge on the same  
620 pathway, post-translational mechanisms are responsible. Furthermore, there is evidence for  
621 post-translational mechanisms necessary for the induction of PHP signaling in *GluRIIA* mutants,  
622 as changes in CamKII phosphorylation and activity have been observed (Haghighi et al., 2003;  
623 Newman et al., 2017). In addition, other post-translational mechanisms, such as protein  
624 degradation or ubiquitination, could contribute to homeostatic signaling in the muscle. However,  
625 if all three manipulations do indeed ultimately utilize the same retrograde signal transduction  
626 system, it is quite intriguing that somehow the global increase in translation observed in Tor-OE  
627 is sculpted, perhaps by shared post-translational mechanisms, into a specific retrograde signal  
628 that instructs enhanced presynaptic release.

629         Second, it is possible that pharmacological, genetic, or Tor-OE-mediated inductions of  
630 PHP signaling are all mechanistically distinct, in which case no common transcriptional,  
631 translational, or post-translational mechanisms would be expected. Indeed, forward genetic  
632 screening approaches to discover genes necessary for PHP expression have failed to identify  
633 any genes needed for PHP induction in the postsynaptic muscle (Dickman and Davis, 2009;  
634 Muller et al., 2011), suggesting possible redundancy in these signaling systems. Finally, it is  
635 possible that very small, local changes in translation are necessary to drive retrograde signaling  
636 in *GluRIIA* mutants and Tor-OE, in which case our ribosome profiling approach may have  
637 lacked sufficient resolution to detect these changes, as tagged ribosomes were purified from  
638 whole cell muscle lysates. Indeed, a recent report demonstrated synapse-specific PHP  
639 expression (Newman et al., 2017), although this would not explain the translation-independent  
640 mechanism underlying PHP induction following pharmacological blockade of postsynaptic  
641 receptors. Future studies utilizing genetic, electrophysiological, biochemical, and imaging  
642 approaches will be necessary to identify the specific post-translational mechanisms that drive

643 PHP signaling, and to what extent shared or distinct mechanisms are common between  
644 pharmacologic, genetic, and Tor-OE mediated PHP signaling.

645

### 646 **Proteostasis and adaptive cellular responses to elevated protein synthesis**

647 Cells possess a remarkable ability to homeostatically control protein expression and stability, a  
648 process called proteostasis (Kaushik and Cuervo, 2015). This requires a robust and highly  
649 orchestrated balance between gene transcription, mRNA translation, and protein degradation  
650 (Sala et al., 2017; Vogel and Marcotte, 2012), while disruption of this process contributes to  
651 aging and disease (Hipp et al., 2014; Labbadia and Morimoto, 2015). Further, proteostatic  
652 mechanisms are not only customized to the unique demands of specific cells and tissues, but  
653 are adjusted throughout developmental stages and even tuned over hours according to diurnal  
654 metabolic and feeding cycles (Atger et al., 2015; Khapre et al., 2014; Sinturel et al., 2017;  
655 Wullschleger et al., 2006). The homeostatic nature of proteostasis is highlighted by the  
656 adaptations triggered in response to perturbations that threaten stable cellular protein levels,  
657 such as starvation and inhibitions of protein degradation (Bush et al., 1997; Fleming et al., 2002;  
658 Shang et al., 2011). We have used transcriptional and ribosome profiling to reveal new  
659 homeostatic adaptations triggered by proteostatic mechanisms that stabilize the proteome  
660 following chronic elevations in protein synthesis. In particular, genes that promote protein  
661 stability (chaperones), protein degradation, and ribosome biogenesis were transcriptionally  
662 and/or translationally upregulated following *Tor* overexpression in muscle, modulations in  
663 complementary pathways that synergistically prevent inappropriate protein interactions, promote  
664 protein removal, and increase the machinery necessary to maintain elevated protein synthesis  
665 (Claypool et al., 2004; Mayer et al., 2004; Zhang et al., 2014). Interestingly, many of these  
666 pathways are also targeted following other homeostatic perturbations to proteome stability,  
667 including heat shock, starvation, and inhibitions in protein degradation (Bar-Peled and Sabatini,  
668 2014; Bush et al., 1997; Richter et al., 2010). This may suggest that proteostatic signaling

669 involves a core program orchestrating adaptive modulations to transcription and translation to a  
670 diverse set of challenges to protein stability. Ribosome profiling enabled the definition of  
671 transcriptional and translational mechanisms that respond to chronic elevations of protein  
672 synthesis, revealing changes in translation that would not be apparent through profiling of total  
673 RNA expression alone.

674 Recent developments in next-generation sequencing have greatly expanded our ability  
675 to investigate complex biological phenomena on genome-wide scales. The power and variety of  
676 sophisticated genetic approaches are well-known in *Drosophila*. These include tissue-specific  
677 expression with a broad array of Gal4 and LexA drivers, transposable element manipulations,  
678 CRISPR/Cas-9 gene editing, and extensive collections of genetic mutations and RNAi lines  
679 (Gratz et al., 2015; Nagarkar-Jaiswal et al., 2015; Spradling et al., 1999; Venken and Bellen,  
680 2014). Although some approaches have emerged to quantify RNA from entire tissues (Brown et  
681 al., 2014; Daines et al., 2011; White et al., 1999), as well as ribosome-associated RNA from  
682 specific tissues (Heiman et al., 2014; Huang et al., 2013; Sanz et al., 2009; Zhang et al., 2016),  
683 the technology described here now adds ribosome profiling to join this powerful toolkit to enable  
684 the determination of translation rates in specific cells at unprecedented resolution.

685

## 686 **MATERIALS AND METHODS**

### 687 **Fly stocks and molecular biology**

688 *Drosophila* stocks were raised at 25°C on standard molasses food. The  $w^{1118}$  strain is used as  
689 the wild type control unless otherwise noted, as this is the genetic background of the transgenic  
690 lines and other genotypes used in this study. The following fly stocks were used: *GluRIIA*<sup>SP16</sup>  
691 (Petersen et al., 1997), *UAS-Tor-myc* (Wang et al., 2012), *RpL3*<sup>G13893</sup> (Bloomington Drosophila  
692 Stock Center, BDSC, Bloomington, IN, USA), *RpL3*<sup>KG05440</sup> (BDSC) . All other *Drosophila* stocks  
693 were obtained from the Bloomington Drosophila Stock Center. Standard second and third  
694 chromosome balancers and genetic strategies were used for all crosses and for maintaining



695 mutant lines. To control for the effects of genetic background on next generation sequencing  
696 data, we generated an isogenic stock. We then bred the genetic elements used in this study,  
697 (*BG57-Gal4*, *UAS-RpL3-Flag*, *GluRIIA<sup>SP16</sup>*, and *UAS-Tor-myc*) into this isogenic line and  
698 outcrossed for five generations to minimize the differences in the genetic background.

699 To generate the *UAS-RpL3-Flag* and *UAS-RpS13-Flag* transgenic lines, we obtained  
700 cDNA containing the entire coding sequences of *RpL3* (FBcl0179489) and *RpS13*  
701 (FBcl0171161). *RpL3* and *RpS13* coding sequence were PCR amplified and sub-cloned into the  
702 pACU2 vector (Han et al., 2011) with C-terminal 3xflag tag using a standard T4 DNA ligase  
703 based cloning strategy. To generate the genomic *RpL3-3xflag* construct, a 6.5kb sequence  
704 containing the entire *RpL3* genomic locus was PCR amplified from a genomic DNA preparation  
705 of *w<sup>1118</sup>* using the following primers 5'-ATCGGTACCACTTACTCCCTTGTTG-3' and 5'-  
706 CAGCTGCAGGGTTTGTGACTGATCTAAAAG-3'. The same linker-3xflag sequence used in  
707 *UAS-RpL3-3xflag* was inserted right before the stop codon of *RpL3* of the PCR amplified  
708 genomic region using extension PCR. This sequence was cloned into the pattB vector (Groth et  
709 al., 2004). Constructs were sequence verified and sent to BestGene Inc. (Chino Hills, CA) for  
710 transgenic integration.

711

## 712 **Affinity purification of ribosomes and library generation**

713 *Tissue collection, lysis and library generation for transcriptional profiling*: 18 female third instar  
714 larvae were dissected in HL-3 saline as previously described (Chen et al., 2017), with all internal  
715 organs and the central nervous system removed, leaving only the body wall and attached  
716 muscle tissue. Following dissection, the tissue was immediately frozen on dry ice. The frozen  
717 tissue was then homogenized in 540  $\mu$ l lysis solution (10 mM HEPES, PH 7.4, 150 mM KCl, 5  
718 mM MgCl<sub>2</sub>, 100  $\mu$ g/ml Cycloheximide) supplemented with 0.5% Triton-X100, 1U/ $\mu$ l ANTI-RNase  
719 (ThermoFisher scientific, AM2690) and protease inhibitor (EDTA-free, Sigma, COEDTAF-RO).  
720 120  $\mu$ l of the lysate was used for total RNA extraction by TRIzol LS Reagent (ThermoFisher



721 scientific, 10296010). 2.5 µg of total RNA was used for isolation of mRNA with the Dynabeads  
722 mRNA DIRECT Purification Kit (ThermoFisher scientific, 61011). The entire isolated mRNA  
723 sample was used for library generation with the NEBNext Ultra Directional RNA Library Prep Kit  
724 for Illumina sequencing (NEB, E7420S).

725

726 *Purification of ribosome associated mRNA and library generation (transcriptional profiling*  
727 *TRAP)*: 180 µl of the lysate described above was incubated with anti-flag antibody coated  
728 magnetic beads to purify ribosomes with associated mRNA. 75 µl of Dynabeads protein G  
729 (ThermoFisher scientific, 10004D) was used to coat 3 µg anti-Flag antibody (Sigma, F1804).  
730 The lysate-beads mixture was incubated at 4°C with rotation for 2 hours, then washed in buffer  
731 (10 mM HEPES, PH 7.4, 150 mM KCl, 5 mM MgCl<sub>2</sub>, 100 µg/ml Cycloheximide), supplemented  
732 with 0.1% Triton-X100 (0.1 U/µl SUPERase in RNase Inhibitor (ThermoFisher scientific,  
733 AM2696). RNA was extracted from ribosomes bound to the beads by TRIzol Reagent, and the  
734 co-precipitant linear acrylamide (ThermoFisher scientific, AM9520) was used to increase the  
735 RNA recovery rate. mRNA isolation and library generation were performed as described above.

736

737 *Library generation for ribosome profiling*: 240 µl of lysate was incubated with anti-Flag antibody  
738 coated magnetic beads and 10000 units of RNase T1 (ThermoFisher scientific, EN0541) to  
739 perform digestion of exposed mRNA and ribosome purification simultaneously. 100 µl of  
740 Dynabeads protein G coated with 4 µg anti-Flag antibody was used. The lysate-beads-RNase  
741 T1 mixture was incubated at 4°C for 6 hours and washed; RNA was extracted as described  
742 above.

743 To perform size selection, the extracted RNA sample was separated on a denaturing  
744 15% polyacrylamide urea gel. The gel region corresponding to 30-45 nt, as estimated by oligo  
745 markers, was excised. The gel slice was homogenized in 500 µl elution buffer (10 mM Tris-HCl,  
746 PH 7.5, 250 mM NaCl, 1 mM EDTA) supplemented with 0.2% SDS and RNAsecure reagent

747 (ThermoFisher scientific, AM7005). The gel slurry was heated at 60°C for 10 min to allow  
748 inactivation of contaminating RNase by RNAsecure reagent and transferred to 4°C for overnight  
749 elution of RNA from the gel. The eluate was collected by centrifuging the gel slurry through a  
750 Spin-X column (Sigma, CLS8162), and RNA was precipitated by adding an equal volume of  
751 isopropanol and 25 µg linear acrylamide, incubated at room temperature for 30 min, and  
752 centrifuged for 15 min at 17000Xg, 4°C. The pellet was air dried and dissolved in 15 µl RNase-  
753 free water.

754 Library generation for ribosome profiling was performed using NEBNext Small RNA  
755 Library Prep Set for Illumina (NEB, E7330S) with minor modifications. The entire size selected  
756 mRNA fragments sample were first treated by phosphatase, rSAP (NEB, M0371S), to remove  
757 the 3'-phosphate. The samples were then incubated and denatured according to manufacturer's  
758 instructions. RNA was precipitated from the reaction as described above, and the 3' adaptor  
759 ligation was performed using NEBNext Small RNA Library Prep Set. The 5'-phosphate was then  
760 added to the mRNA fragments by supplying 2.5 µl 10 mM ATP, 1.5 µl 50 mM DTT and 0.5 µl T4  
761 Polynucleotide Kinase (NEB, M0201S) to the 20 µl 3' adaptor ligation reaction and incubating at  
762 37°C for 30 min. 1 µl SR RT primer of the NEBNext Small RNA Library Prep Set was then  
763 added to the T4 polynucleotide kinase reaction and RT primer hybridization was performed. 5'  
764 adaptor ligation, reverse transcription, PCR amplification and size selection of the PCR  
765 amplified library were performed using the NEBNext Small RNA Library Prep Set.

766

### 767 **High-throughput sequencing and data analysis**

768 All libraries were sequenced on the Illumina NextSeq platform (single read, 75 cycles), and  
769 three replicates were performed for each genotype. Sequencing data analysis was performed  
770 using CLC genomics Workbench 8.0 software (Qiagen). Raw reads were trimmed based on  
771 quality scores, and adaptor sequences were removed from reads. Trimmed high quality reads  
772 were then mapped to the *Drosophila* genome (*Drosophila melanogaster*, NCBI genome release

773 5\_48). Only genes with more than 10 reads uniquely mapped to their exons were considered  
774 reliably detected and further analyzed. Relative mRNA expression levels were quantified by  
775 calculating RPKM (Reads Per Kilobase of exon per Million mapped reads) using mapping  
776 results from transcriptional profiling. Relative translation levels were quantified by calculating  
777 RPKM (Reads Per Kilobase of exon per Million mapped reads) using mapping results from  
778 ribosome profiling. Translation efficiency was calculated by dividing ribosome profiling (or  
779 translational profiling TRAP) RPKM by transcriptional profiling RPKM.

780 To determine differentially transcribed or translated genes, a weighted t-type test  
781 (Baggerly et al., 2003) was performed based on three replicate expression values for each gene  
782 between *GluRIIA* mutants and wild type, and Tor-OE and wild type using the statistical analysis  
783 tool of CLC genomics workbench. The analysis was performed on expression values obtained  
784 by transcriptional profiling to determine differentially transcribed genes, and on expression  
785 values obtained by ribosome profiling to determine differentially translated genes. Genes with a  
786 p-value less than 0.05 and fold change higher than 3-fold were considered differentially  
787 transcribed or translated. We also determined differentially transcribed or translated genes  
788 using R package DESeq2 analysis (Love et al., 2014), considering genes with adjusted p-values  
789 less than 0.05 as differentially expressed. The Baggerly's t test method and DESeq2 method  
790 produced highly similar lists of differentially expressed genes. Genes only revealed by one  
791 method were excluded from the final list. To determine gene targets undergoing translational  
792 regulation in *GluRIIA* mutants and Tor-OE compared to wild type, two criteria were used. First,  
793 the gene must have at least a 2-fold significant increase ( $p < 0.05$ , Student's t test) in translation  
794 efficiency compared to wild type. Second, a significant increase in ribosome profiling expression  
795 value ( $p < 0.05$ , Baggerly's t test) must also exist for the same gene. These two criteria ensure  
796 identification of genes that have true translational up-regulation that are not due to  
797 transcriptional changes.

798

## 799 **Immunocytochemistry and confocal imaging**

800 Third-instar larvae were dissected in ice cold 0 Ca<sup>2+</sup> HL-3 and fixed in Bouin's fixative for 2 min  
801 as described (Chen et al., 2017). Mouse anti-Flag (Sigma, F1804) was used at 1:500, while  
802 donkey anti-mouse Alexa Fluor 488-conjugated secondary antibody (Jackson ImmunoResearch)  
803 was used at 1:400. Alexa Fluor 647-conjugated goat anti-HRP (Jackson ImmunoResearch) was  
804 used at 1:200. Samples were imaged using a Nikon A1R Resonant Scanning Confocal  
805 microscope equipped with NIS Elements software and a 100x APO 1.4NA oil immersion  
806 objective, using separate channels with two laser lines (488 nm and 561 nm). Images were  
807 obtained using settings optimized for detection without saturation of the signal.

808

## 809 **Electrophysiology**

810 All recordings were performed in modified HL-3 saline supplied with 0.3 mM Ca<sup>2+</sup> as described  
811 (Chen et al., 2017; Kiragasi et al., 2017).

812

## 813 **Statistical Analysis**

814 All data are presented as mean +/-SEM. Student's *t* test was used to compare two groups. A  
815 one-way ANOVA followed by a post-hoc Bonferroni's test was used to compare three or more  
816 groups. All data was analyzed using Graphpad Prism or Microsoft Excel software, with varying  
817 levels of significance assessed as p<0.05 (\*), p<0.01 (\*\*), p<0.001 (\*\*\*), N.S.=not significant.

818 Statistical analysis on next generation sequencing data was described in the High-throughput  
819 sequencing and data analysis section.

820

## 821 **ACKNOWLEDGEMENTS**

822 The authors declare no competing financial interests. We thank Pejmun Haghighi (Buck  
823 Institute, CA, USA) for sharing *Drosophila* stocks. We thank Chun Han (Cornell University, NY,  
824 USA) for sharing the pACU2 vector and for insights into controlling gene expression with this

825 vector. We acknowledge the Developmental Studies Hybridoma Bank (Iowa, USA) for  
826 antibodies used in this study, and the Bloomington Drosophila Stock Center (NIH P4OD018537)  
827 for fly stocks. This work was supported by a grant from the National Institutes of Health  
828 (NS019546) and research fellowships from the Alfred P. Sloan, Ellison Medical, Whitehall,  
829 Klingenstein-Simons, and Mallinckrodt Foundations to DKD.

830

### 831 **AUTHOR CONTRIBUTIONS**

832 The project was conceived by XC and DKD. XC obtained all experimental data. The manuscript  
833 was written by XC and DKD.

834

### 835 **REFERENCES**

836 Anger, A.M., Armache, J.P., Berninghausen, O., Habeck, M., Subklewe, M., Wilson, D.N., and  
837 Beckmann, R. (2013). Structures of the human and Drosophila 80S ribosome. *Nature* *497*, 80-  
838 85.

839 Atger, F., Gobet, C., Marquis, J., Martin, E., Wang, J., Weger, B., Lefebvre, G., Descombes, P.,  
840 Naef, F., and Gachon, F. (2015). Circadian and feeding rhythms differentially affect rhythmic  
841 mRNA transcription and translation in mouse liver. *Proc Natl Acad Sci U S A* *112*, E6579-6588.

842 Baggerly, K.A., Deng, L., Morris, J.S., and Aldaz, C.M. (2003). Differential expression in SAGE:  
843 accounting for normal between-library variation. *Bioinformatics* *19*, 1477-1483.

844 Bar-Peled, L., and Sabatini, D.M. (2014). Regulation of mTORC1 by amino acids. *Trends Cell*  
845 *Biol* *24*, 400-406.

846 Ben-Shem, A., Garreau de Loubresse, N., Melnikov, S., Jenner, L., Yusupova, G., and  
847 Yusupov, M. (2011). The structure of the eukaryotic ribosome at 3.0 Å resolution. *Science* *334*,  
848 1524-1529.

- 849 Brand, A.H., and Perrimon, N. (1993). Targeted gene expression as a means of altering cell  
850 fates and generating dominant phenotypes. *Development* 118, 401-415.
- 851 Brar, G.A., and Weissman, J.S. (2015). Ribosome profiling reveals the what, when, where and  
852 how of protein synthesis. *Nat Rev Mol Cell Biol* 16, 651-664.
- 853 Brown, J.B., Boley, N., Eisman, R., May, G.E., Stoiber, M.H., Duff, M.O., Booth, B.W., Wen, J.,  
854 Park, S., Suzuki, A.M., *et al.* (2014). Diversity and dynamics of the *Drosophila* transcriptome.  
855 *Nature* 512, 393-399.
- 856 Bukau, B., Weissman, J., and Horwich, A. (2006). Molecular chaperones and protein quality  
857 control. *Cell* 125, 443-451.
- 858 Bush, K.T., Goldberg, A.L., and Nigam, S.K. (1997). Proteasome inhibition leads to a heat-  
859 shock response, induction of endoplasmic reticulum chaperones, and thermotolerance. *J Biol*  
860 *Chem* 272, 9086-9092.
- 861 Chekulaeva, M., and Landthaler, M. (2016). Eyes on Translation. *Mol Cell* 63, 918-925.
- 862 Chen, X., Ma, W., Zhang, S., Paluch, J., Guo, W., and Dickman, D.K. (2017). The BLOC-1  
863 Subunit Pallidin Facilitates Activity-Dependent Synaptic Vesicle Recycling. *eNeuro* 4.
- 864 Chen, X., Rahman, R., Guo, F., and Rosbash, M. (2016). Genome-wide identification of  
865 neuronal activity-regulated genes in *Drosophila*. *Elife* 5.
- 866 Chen, X., and Rosbash, M. (2017). MicroRNA-92a is a circadian modulator of neuronal  
867 excitability in *Drosophila*. *Nat Commun* 8, 14707.

- 868 Cho, J., Yu, N.K., Choi, J.H., Sim, S.E., Kang, S.J., Kwak, C., Lee, S.W., Kim, J.I., Choi, D.I.,  
869 Kim, V.N., *et al.* (2015). Multiple repressive mechanisms in the hippocampus during memory  
870 formation. *Science* 350, 82-87.
- 871 Claypool, J.A., French, S.L., Johzuka, K., Eliason, K., Vu, L., Dodd, J.A., Beyer, A.L., and  
872 Nomura, M. (2004). Tor pathway regulates Rrn3p-dependent recruitment of yeast RNA  
873 polymerase I to the promoter but does not participate in alteration of the number of active  
874 genes. *Mol Biol Cell* 15, 946-956.
- 875 Daines, B., Wang, H., Wang, L., Li, Y., Han, Y., Emmert, D., Gelbart, W., Wang, X., Li, W.,  
876 Gibbs, R., *et al.* (2011). The *Drosophila melanogaster* transcriptome by paired-end RNA  
877 sequencing. *Genome Res* 21, 315-324.
- 878 Davis, G.W. (2013). Homeostatic signaling and the stabilization of neural function. *Neuron* 80,  
879 718-728.
- 880 Davis, G.W., and Muller, M. (2015). Homeostatic control of presynaptic neurotransmitter  
881 release. *Annu Rev Physiol* 77, 251-270.
- 882 Dickman, D.K., and Davis, G.W. (2009). The schizophrenia susceptibility gene dysbindin  
883 controls synaptic homeostasis. *Science* 326, 1127-1130.
- 884 Dickman, D.K., Tong, A., and Davis, G.W. (2012). Snapin is critical for presynaptic homeostatic  
885 plasticity. *The Journal of neuroscience : the official journal of the Society for Neuroscience* 32,  
886 8716-8724.
- 887 Dunn, J.G., Foo, C.K., Belletier, N.G., Gavis, E.R., and Weissman, J.S. (2013). Ribosome  
888 profiling reveals pervasive and regulated stop codon readthrough in *Drosophila melanogaster*.  
889 *Elife* 2, e01179.

- 890 Fleming, J.A., Lightcap, E.S., Sadis, S., Thoroddsen, V., Bulawa, C.E., and Blackman, R.K.  
891 (2002). Complementary whole-genome technologies reveal the cellular response to proteasome  
892 inhibition by PS-341. *Proc Natl Acad Sci U S A* *99*, 1461-1466.
- 893 Frank, C.A. (2014). Homeostatic plasticity at the *Drosophila* neuromuscular junction.  
894 *Neuropharmacology* *78*, 63-74.
- 895 Frank, C.A., Kennedy, M.J., Goold, C.P., Marek, K.W., and Davis, G.W. (2006). Mechanisms  
896 underlying the rapid induction and sustained expression of synaptic homeostasis. *Neuron* *52*,  
897 663-677.
- 898 Frank, C.A., Pielage, J., and Davis, G.W. (2009). A presynaptic homeostatic signaling system  
899 composed of the Eph receptor, ephexin, Cdc42, and CaV2.1 calcium channels. *Neuron* *61*, 556-  
900 569.
- 901 Genc, O., Dickman, D.K., Ma, W., Tong, A., Fetter, R.D., and Davis, G.W. (2017). MCTP is an  
902 ER-resident calcium sensor that stabilizes synaptic transmission and homeostatic plasticity.  
903 *Elife* *6*.
- 904 Glickman, M.H., and Ciechanover, A. (2002). The ubiquitin-proteasome proteolytic pathway:  
905 destruction for the sake of construction. *Physiol Rev* *82*, 373-428.
- 906 Gonzalez, C., Sims, J.S., Hornstein, N., Mela, A., Garcia, F., Lei, L., Gass, D.A., Amendolara,  
907 B., Bruce, J.N., Canoll, P., *et al.* (2014). Ribosome profiling reveals a cell-type-specific  
908 translational landscape in brain tumors. *J Neurosci* *34*, 10924-10936.
- 909 Gratz, S.J., Rubinstein, C.D., Harrison, M.M., Wildonger, J., and O'Connor-Giles, K.M. (2015).  
910 CRISPR-Cas9 Genome Editing in *Drosophila*. *Curr Protoc Mol Biol* *111*, 31 32 31-20.



- 911 Groth, A.C., Fish, M., Nusse, R., and Calos, M.P. (2004). Construction of transgenic *Drosophila*  
912 by using the site-specific integrase from phage phiC31. *Genetics* 166, 1775-1782.
- 913 Haghghi, A.P., McCabe, B.D., Fetter, R.D., Palmer, J.E., Hom, S., and Goodman, C.S. (2003).  
914 Retrograde control of synaptic transmission by postsynaptic CaMKII at the *Drosophila*  
915 neuromuscular junction. *Neuron* 39, 255-267.
- 916 Halbeisen, R.E., and Gerber, A.P. (2009). Stress-dependent coordination of transcriptome and  
917 translome in yeast. *PLoS Biol* 7, e1000105.
- 918 Han, C., Jan, L.Y., and Jan, Y.N. (2011). Enhancer-driven membrane markers for analysis of  
919 nonautonomous mechanisms reveal neuron-glia interactions in *Drosophila*. *Proc Natl Acad Sci*  
920 *U S A* 108, 9673-9678.
- 921 Harris, N., Braiser, D.J., Dickman, D.K., Fetter, R.D., Tong, A., and Davis, G.W. (2015). The  
922 Innate Immune Receptor PGRP-LC Controls Presynaptic Homeostatic Plasticity. *Neuron* 88,  
923 1157-1164.
- 924 Heiman, M., Kulicke, R., Fenster, R.J., Greengard, P., and Heintz, N. (2014). Cell type-specific  
925 mRNA purification by translating ribosome affinity purification (TRAP). *Nat Protoc* 9, 1282-1291.
- 926 Heiman, M., Schaefer, A., Gong, S., Peterson, J.D., Day, M., Ramsey, K.E., Suarez-Farinas,  
927 M., Schwarz, C., Stephan, D.A., Surmeier, D.J., *et al.* (2008). A translational profiling approach  
928 for the molecular characterization of CNS cell types. *Cell* 135, 738-748.
- 929 Hetz, C. (2012). The unfolded protein response: controlling cell fate decisions under ER stress  
930 and beyond. *Nat Rev Mol Cell Biol* 13, 89-102.
- 931 Hipp, M.S., Park, S.H., and Hartl, F.U. (2014). Proteostasis impairment in protein-misfolding and  
932 -aggregation diseases. *Trends Cell Biol* 24, 506-514.

- 933 Hohfeld, J., Cyr, D.M., and Patterson, C. (2001). From the cradle to the grave: molecular  
934 chaperones that may choose between folding and degradation. *EMBO Rep* 2, 885-890.
- 935 Huang, J., and Bonni, A. (2016). A decade of the anaphase-promoting complex in the nervous  
936 system. *Genes Dev* 30, 622-638.
- 937 Huang, Y., Ainsley, J.A., Reijmers, L.G., and Jackson, F.R. (2013). Translational profiling of  
938 clock cells reveals circadianly synchronized protein synthesis. *PLoS Biol* 11, e1001703.
- 939 Ingolia, N.T. (2016). Ribosome Footprint Profiling of Translation throughout the Genome. *Cell*  
940 165, 22-33.
- 941 Ingolia, N.T., Brar, G.A., Rouskin, S., McGeachy, A.M., and Weissman, J.S. (2012). The  
942 ribosome profiling strategy for monitoring translation in vivo by deep sequencing of ribosome-  
943 protected mRNA fragments. *Nat Protoc* 7, 1534-1550.
- 944 Ingolia, N.T., Ghaemmaghami, S., Newman, J.R., and Weissman, J.S. (2009). Genome-wide  
945 analysis in vivo of translation with nucleotide resolution using ribosome profiling. *Science* 324,  
946 218-223.
- 947 Ingolia, N.T., Lareau, L.F., and Weissman, J.S. (2011). Ribosome profiling of mouse embryonic  
948 stem cells reveals the complexity and dynamics of mammalian proteomes. *Cell* 147, 789-802.
- 949 Jackson, R.J., Hellen, C.U., and Pestova, T.V. (2010). The mechanism of eukaryotic translation  
950 initiation and principles of its regulation. *Nat Rev Mol Cell Biol* 11, 113-127.
- 951 Jefferies, H.B., Reinhard, C., Kozma, S.C., and Thomas, G. (1994). Rapamycin selectively  
952 represses translation of the "polypyrimidine tract" mRNA family. *Proc Natl Acad Sci U S A* 91,  
953 4441-4445.

- 954 Jeong, Y., Kim, J.N., Kim, M.W., Bucca, G., Cho, S., Yoon, Y.J., Kim, B.G., Roe, J.H., Kim,  
955 S.C., Smith, C.P., *et al.* (2016). The dynamic transcriptional and translational landscape of the  
956 model antibiotic producer *Streptomyces coelicolor* A3(2). *Nat Commun* 7, 11605.
- 957 Kaushik, S., and Cuervo, A.M. (2015). Proteostasis and aging. *Nat Med* 21, 1406-1415.
- 958 Kauwe, G., Tsurudome, K., Penney, J., Mori, M., Gray, L., Calderon, M.R., Elazouzzi, F.,  
959 Chicoine, N., Sonenberg, N., and Haghghi, A.P. (2016). Acute Fasting Regulates Retrograde  
960 Synaptic Enhancement through a 4E-BP-Dependent Mechanism. *Neuron* 92, 1204-1212.
- 961 Khapre, R.V., Patel, S.A., Kondratova, A.A., Chaudhary, A., Velingkaar, N., Antoch, M.P., and  
962 Kondratov, R.V. (2014). Metabolic clock generates nutrient anticipation rhythms in mTOR  
963 signaling. *Aging (Albany NY)* 6, 675-689.
- 964 Khatter, H., Myasnikov, A.G., Natchiar, S.K., and Klaholz, B.P. (2015). Structure of the human  
965 80S ribosome. *Nature* 520, 640-645.
- 966 Kiragasi, B., Wondolowski, J., Li, Y., and Dickman, D.K. (2017). A Presynaptic Glutamate  
967 Receptor Subunit Confers Robustness to Neurotransmission and Homeostatic Potentiation. *Cell*  
968 *Rep* 19, 2694-2706.
- 969 Kong, J., and Lasko, P. (2012). Translational control in cellular and developmental processes.  
970 *Nat Rev Genet* 13, 383-394.
- 971 Labbadia, J., and Morimoto, R.I. (2015). The biology of proteostasis in aging and disease. *Annu*  
972 *Rev Biochem* 84, 435-464.
- 973 Li, G.W., Burkhardt, D., Gross, C., and Weissman, J.S. (2014). Quantifying absolute protein  
974 synthesis rates reveals principles underlying allocation of cellular resources. *Cell* 157, 624-635.

- 975 Li, G.W., Oh, E., and Weissman, J.S. (2012). The anti-Shine-Dalgarno sequence drives  
976 translational pausing and codon choice in bacteria. *Nature* *484*, 538-541.
- 977 Liu, Y., Beyer, A., and Aebersold, R. (2016). On the Dependency of Cellular Protein Levels on  
978 mRNA Abundance. *Cell* *165*, 535-550.
- 979 Love, M.I., Huber, W., and Anders, S. (2014). Moderated estimation of fold change and  
980 dispersion for RNA-seq data with DESeq2. *Genome Biol* *15*, 550.
- 981 Mayer, C., Zhao, J., Yuan, X., and Grummt, I. (2004). mTOR-dependent activation of the  
982 transcription factor TIF-IA links rRNA synthesis to nutrient availability. *Genes Dev* *18*, 423-434.
- 983 Meier, J.C., Semtner, M., Winkelmann, A., and Wolfart, J. (2014). Presynaptic mechanisms of  
984 neuronal plasticity and their role in epilepsy. *Front Cell Neurosci* *8*, 164.
- 985 Mortazavi, A., Williams, B.A., McCue, K., Schaeffer, L., and Wold, B. (2008). Mapping and  
986 quantifying mammalian transcriptomes by RNA-Seq. *Nat Methods* *5*, 621-628.
- 987 Muller, M., and Davis, G.W. (2012). Transsynaptic control of presynaptic Ca<sup>2+</sup>(+) influx  
988 achieves homeostatic potentiation of neurotransmitter release. *Curr Biol* *22*, 1102-1108.
- 989 Muller, M., Genc, O., and Davis, G.W. (2015). RIM-binding protein links synaptic homeostasis to  
990 the stabilization and replenishment of high release probability vesicles. *Neuron* *85*, 1056-1069.
- 991 Muller, M., Liu, K.S., Sigrist, S.J., and Davis, G.W. (2012). RIM controls homeostatic plasticity  
992 through modulation of the readily-releasable vesicle pool. *J Neurosci* *32*, 16574-16585.
- 993 Muller, M., Pym, E.C., Tong, A., and Davis, G.W. (2011). Rab3-GAP controls the progression of  
994 synaptic homeostasis at a late stage of vesicle release. *Neuron* *69*, 749-762.

- 995 Nagarkar-Jaiswal, S., Lee, P.T., Campbell, M.E., Chen, K., Anguiano-Zarate, S., Gutierrez,  
996 M.C., Busby, T., Lin, W.W., He, Y., Schulze, K.L., *et al.* (2015). A library of MiMICs allows  
997 tagging of genes and reversible, spatial and temporal knockdown of proteins in *Drosophila*. *Elife*  
998 4.
- 999 Nelson, S.B., and Valakh, V. (2015). Excitatory/Inhibitory Balance and Circuit Homeostasis in  
1000 Autism Spectrum Disorders. *Neuron* 87, 684-698.
- 1001 Newman, Z.L., Hoagland, A., Aghi, K., Worden, K., Levy, S.L., Son, J.H., Lee, L.P., and Isacoff,  
1002 E.Y. (2017). Input-Specific Plasticity and Homeostasis at the *Drosophila* Larval Neuromuscular  
1003 Junction. *Neuron* 93, 1388-1404 e1310.
- 1004 Ozsolak, F., and Milos, P.M. (2011). RNA sequencing: advances, challenges and opportunities.  
1005 *Nat Rev Genet* 12, 87-98.
- 1006 Penney, J., Tsurudome, K., Liao, E.H., Elazzouzi, F., Livingstone, M., Gonzalez, M., Sonenberg,  
1007 N., and Haghighi, A.P. (2012). TOR is required for the retrograde regulation of synaptic  
1008 homeostasis at the *Drosophila* neuromuscular junction. *Neuron* 74, 166-178.
- 1009 Penney, J., Tsurudome, K., Liao, E.H., Kauwe, G., Gray, L., Yanagiya, A., M, R.C., Sonenberg,  
1010 N., and Haghighi, A.P. (2016). LRRK2 regulates retrograde synaptic compensation at the  
1011 *Drosophila* neuromuscular junction. *Nat Commun* 7, 12188.
- 1012 Petersen, S.A., Fetter, R.D., Noordermeer, J.N., Goodman, C.S., and DiAntonio, A. (1997).  
1013 Genetic analysis of glutamate receptors in *Drosophila* reveals a retrograde signal regulating  
1014 presynaptic transmitter release. *Neuron* 19, 1237-1248.
- 1015 Pozo, K., and Goda, Y. (2010). Unraveling mechanisms of homeostatic synaptic plasticity.  
1016 *Neuron* 66, 337-351.

- 1017 Richter, K., Haslbeck, M., and Buchner, J. (2010). The heat shock response: life on the verge of  
1018 death. *Mol Cell* *40*, 253-266.
- 1019 Romisch, K. (2005). Endoplasmic reticulum-associated degradation. *Annu Rev Cell Dev Biol* *21*,  
1020 435-456.
- 1021 Sala, A.J., Bott, L.C., and Morimoto, R.I. (2017). Shaping proteostasis at the cellular, tissue, and  
1022 organismal level. *J Cell Biol*.
- 1023 Sanz, E., Yang, L., Su, T., Morris, D.R., McKnight, G.S., and Amieux, P.S. (2009). Cell-type-  
1024 specific isolation of ribosome-associated mRNA from complex tissues. *Proc Natl Acad Sci U S*  
1025 *A* *106*, 13939-13944.
- 1026 Saxton, R.A., and Sabatini, D.M. (2017). mTOR Signaling in Growth, Metabolism, and Disease.  
1027 *Cell* *168*, 960-970.
- 1028 Shang, L., Chen, S., Du, F., Li, S., Zhao, L., and Wang, X. (2011). Nutrient starvation elicits an  
1029 acute autophagic response mediated by Ulk1 dephosphorylation and its subsequent  
1030 dissociation from AMPK. *Proc Natl Acad Sci U S A* *108*, 4788-4793.
- 1031 Sinturel, F., Gerber, A., Mauvoisin, D., Wang, J., Gatfield, D., Stubblefield, J.J., Green, C.B.,  
1032 Gachon, F., and Schibler, U. (2017). Diurnal Oscillations in Liver Mass and Cell Size  
1033 Accompany Ribosome Assembly Cycles. *Cell* *169*, 651-663 e614.
- 1034 Spradling, A.C., Stern, D., Beaton, A., Rhem, E.J., Lavery, T., Mozden, N., Misra, S., and  
1035 Rubin, G.M. (1999). The Berkeley Drosophila Genome Project gene disruption project: Single P-  
1036 element insertions mutating 25% of vital Drosophila genes. *Genetics* *153*, 135-177.
- 1037 Spriggs, K.A., Bushell, M., and Willis, A.E. (2010). Translational regulation of gene expression  
1038 during conditions of cell stress. *Mol Cell* *40*, 228-237.

- 1039 Taipale, M., Jarosz, D.F., and Lindquist, S. (2010). HSP90 at the hub of protein homeostasis:  
1040 emerging mechanistic insights. *Nat Rev Mol Cell Biol* 11, 515-528.
- 1041 Thomas, A., Lee, P.J., Dalton, J.E., Nomie, K.J., Stoica, L., Costa-Mattioli, M., Chang, P.,  
1042 Nuzhdin, S., Arbeitman, M.N., and Dierick, H.A. (2012). A versatile method for cell-specific  
1043 profiling of translated mRNAs in *Drosophila*. *PLoS One* 7, e40276.
- 1044 Thoreen, C.C., Chantranupong, L., Keys, H.R., Wang, T., Gray, N.S., and Sabatini, D.M. (2012).  
1045 A unifying model for mTORC1-mediated regulation of mRNA translation. *Nature* 485, 109-113.
- 1046 Tiebe, M., Lutz, M., De La Garza, A., Buechling, T., Boutros, M., and Teleman, A.A. (2015).  
1047 REPTOR and REPTOR-BP Regulate Organismal Metabolism and Transcription Downstream of  
1048 TORC1. *Dev Cell* 33, 272-284.
- 1049 Tsurudome, K., Tsang, K., Liao, E.H., Ball, R., Penney, J., Yang, J.S., Elazzouzi, F., He, T.,  
1050 Chishti, A., Lnenicka, G., *et al.* (2010). The *Drosophila* miR-310 cluster negatively regulates  
1051 synaptic strength at the neuromuscular junction. *Neuron* 68, 879-893.
- 1052 Turrigiano, G. (2012). Homeostatic synaptic plasticity: local and global mechanisms for  
1053 stabilizing neuronal function. *Cold Spring Harb Perspect Biol* 4, a005736.
- 1054 Turrigiano, G.G. (2008). The self-tuning neuron: synaptic scaling of excitatory synapses. *Cell*  
1055 135, 422-435.
- 1056 van Riggelen, J., Yetil, A., and Felsher, D.W. (2010). MYC as a regulator of ribosome  
1057 biogenesis and protein synthesis. *Nat Rev Cancer* 10, 301-309.
- 1058 Venken, K.J., and Bellen, H.J. (2014). Chemical mutagens, transposons, and transgenes to  
1059 interrogate gene function in *Drosophila melanogaster*. *Methods* 68, 15-28.

- 1060 Vogel, C., and Marcotte, E.M. (2012). Insights into the regulation of protein abundance from  
1061 proteomic and transcriptomic analyses. *Nat Rev Genet* 13, 227-232.
- 1062 Wang, T., Blumhagen, R., Lao, U., Kuo, Y., and Edgar, B.A. (2012). LST8 regulates cell growth  
1063 via target-of-rapamycin complex 2 (TORC2). *Mol Cell Biol* 32, 2203-2213.
- 1064 Wang, T., Jones, R.T., Whippen, J.M., and Davis, G.W. (2016). alpha2delta-3 Is Required for  
1065 Rapid Transsynaptic Homeostatic Signaling. *Cell Rep* 16, 2875-2888.
- 1066 Wang, Z., Gerstein, M., and Snyder, M. (2009). RNA-Seq: a revolutionary tool for  
1067 transcriptomics. *Nat Rev Genet* 10, 57-63.
- 1068 White, K.P., Rifkin, S.A., Hurban, P., and Hogness, D.S. (1999). Microarray analysis of  
1069 *Drosophila* development during metamorphosis. *Science* 286, 2179-2184.
- 1070 White, R.J. (2005). RNA polymerases I and III, growth control and cancer. *Nat Rev Mol Cell Biol*  
1071 6, 69-78.
- 1072 Wondolowski, J., and Dickman, D. (2013). Emerging links between homeostatic synaptic  
1073 plasticity and neurological disease. *Front Cell Neurosci* 7, 223.
- 1074 Wullschleger, S., Loewith, R., and Hall, M.N. (2006). TOR signaling in growth and metabolism.  
1075 *Cell* 124, 471-484.
- 1076 Yang, Z., Edenberg, H.J., and Davis, R.L. (2005). Isolation of mRNA from specific tissues of  
1077 *Drosophila* by mRNA tagging. *Nucleic Acids Res* 33, e148.
- 1078 Younger, M.A., Muller, M., Tong, A., Pym, E.C., and Davis, G.W. (2013). A presynaptic ENaC  
1079 channel drives homeostatic plasticity. *Neuron* 79, 1183-1196.



1080 Zhang, K.X., Tan, L., Pellegrini, M., Zipursky, S.L., and McEwen, J.M. (2016). Rapid Changes in  
1081 the Translatome during the Conversion of Growth Cones to Synaptic Terminals. *Cell Rep* 14,  
1082 1258-1271.

1083 Zhang, Y., Nicholatos, J., Dreier, J.R., Ricoult, S.J., Widenmaier, S.B., Hotamisligil, G.S.,  
1084 Kwiatkowski, D.J., and Manning, B.D. (2014). Coordinated regulation of protein synthesis and  
1085 degradation by mTORC1. *Nature* 513, 440-443.

1086

1087

1088

1089 **Figure Legends**

1090

1091 **Fig 1: Schematic detailing transcriptional and translational profiling of retrograde**

1092 **signaling at the *Drosophila* NMJ. (A)** Schematic illustrating synaptic transmission at the

1093 *Drosophila* NMJ. Representative EPSP and mEPSP electrophysiological traces in wild type

1094 ( $w^{1118}$ ; n=6), *GluRIIA* mutants ( $w;GluRIIA^{SP16}$ ; n=6), and overexpression of *Tor* in the

1095 postsynaptic muscle (Tor-OE:  $w;UAS-Tor-myc/+;BG57-Gal4/+$ ; n=6). Note that while mEPSP

1096 amplitudes are reduced in *GluRIIA* mutants, EPSP amplitudes remain the same as wild type

1097 because of a homeostatic increase in presynaptic release (quantal content). Tor-OE does not

1098 change mEPSP amplitude, but retrograde homeostatic signaling is induced, leading to

1099 increased EPSP amplitude and quantal content. Quantification of mEPSP amplitude **(B)**, EPSP

1100 amplitude **(C)**, and quantal content **(D)** for the indicated genotypes. **(E)** Schematic illustrating

1101 the putative role of protein synthesis in retrograde homeostatic signaling and the design of

1102 ribosome tagging to isolate postsynaptic RNA. **(F)** Schematic representing the workflow for

1103 transcriptional profiling, translational profiling using TRAP (translating ribosome affinity

1104 purification), and ribosome profiling. Student's t test was used to compare *GluRIIA* and Tor-OE

1105 to wild type; \*\*=p<0.01.

1106

1107 **Fig 2: Development and verification of an optimized ribosome profiling protocol in**

1108 ***Drosophila*. (A)** Schematic illustrating the ribosome affinity purification strategy. A tagged

1109 ribosome subunit (RpL3-Flag) is expressed and incorporated into ribosomes. Magnetic beads

1110 coated with anti-flag antibodies are used to immunoprecipitate ribosomes along with associated

1111 mRNA. **(B)** Anti-flag immunoprecipitation from wild-type control, postsynaptic expression of

1112 RpL3-Flag ( $w;BG57-Gal4/UAS-RpL3-3xflag$ ), and postsynaptic expression of RpS13-Flag

1113 ( $w;BG57-Gal4/UAS-RpS13-3xflag$ ) in third-instar larval muscle. Sample was run on an SDS-

1114 PAGE gel and Commassie stained. The expected distribution of ribosomal proteins are present  
1115 in RpL3-Flag and RpS13-Flag samples (noted by arrowheads), but not observed in wild-type  
1116 controls. **(C)** Total RNA was extracted from anti-flag immunoprecipitations from wild type and  
1117 RpL3-Flag larval muscle tissue and run on an agarose gel. Ribosomal RNA is present in RpL3-  
1118 Flag RNA samples but absent in wild-type samples. Total RNA extracted from wild type whole  
1119 larvae was loaded to show the position of ribosomal RNA. **(D)** Workflow for ribosome profiling  
1120 strategy. **(E)** Representative RNA-seq mapping of the *actin57B* locus from transcriptional,  
1121 translational (TRAP), and ribosome profiling. Note that ribosome profiling reads predominantly  
1122 map to 5'UTR and coding regions, and are absent from the 3'UTR. RPM: reads per million total  
1123 mapped reads. **(F)** Replicate ribosome profiling sequencing demonstrates highly reproducible  
1124 results.

1125

1126 **Fig 3: Comparison of translational and ribosome profiling from *Drosophila* larval muscle.**

1127 **(A)** Plot of ribosome profiling RPKM as a function of transcriptional profiling RPKM for all muscle  
1128 genes in wild type. Genes with high translation efficiency (TE;  $TE > 2$ ) or low TE ( $TE < 0.5$ ) are  
1129 labeled in red and blue respectively. Genes with medium TE (TE between 0.5 and 2, indicated  
1130 by the two dash lines) are labeled in grey. **(B)** Plot of translational profiling (TRAP) RPKM as a  
1131 function of transcriptional profiling RPKM for all muscle genes in wild type. The same color  
1132 coding scheme is used as in (A). **(C)** Graph showing percentage of total muscle genes that are  
1133 in the high TE, medium TE or low TE group based on ribosome profiling or TRAP. Note that a  
1134 lower percentage of genes are revealed to have high or low TE with TRAP compared to  
1135 ribosome profiling. **(D)** Plot of translational efficiency of genes defined by ribosome profiling as a  
1136 ratio of TRAP in three categories: high TE (ribosome profiling and TRAP TE average  $> 2$ ),  
1137 medium TE (TE average between 0.5 and 2), and low TE (TE average  $< 0.5$ ). Note that ribosome  
1138 profiling reveals higher TE for high TE genes, and lower TE for low TE genes compared to  
1139 TRAP. \*\*\*= $p < 0.001$ ; one-way ANOVA with post hoc Bonferroni's test.

1140

1141 **Fig 4: Analysis of the transcriptome and translome reveals dynamic translational**  
1142 **regulation in *Drosophila* muscle. (A)** Definition of number of genes encoded in the *Drosophila*  
1143 genome and those expressed in the muscle transcriptome and translome. **(B)** Heatmap  
1144 showing transcriptional levels of all annotated genes in the *Drosophila* larval muscle compared  
1145 to those expressed in the central nervous system (CNS; (Brown et al., 2014)). These genes are  
1146 grouped into four sections according to their expression status in muscle and CNS; the  
1147 percentage of total genes is indicated above each section. **(C)** Heatmap showing translation  
1148 efficiency (TE) and transcription and translation expression levels (RPKM) of genes expressed  
1149 in muscle. Genes are ordered according to translation efficiency, with a trend observed for  
1150 genes with high translation efficiency having low transcriptional expression levels and vice  
1151 versa. **(D)** Transcriptional expression levels of genes with low TE (TE<0.5, blue), medium TE  
1152 (TE between 0.5 and 2, grey) and high TE (TE>2, red). The transcriptional expression levels of  
1153 genes in the low TE group is significantly higher than that of the medium TE group, while  
1154 transcriptional expression of the high TE group is significantly lower than the that of the medium  
1155 TE group (\*\*=p<0.001; one-way ANOVA with post hoc Bonferroni's test). **(E)** Histogram of  
1156 translation efficiency across all genes expressed in the muscle. The 100 genes with the lowest  
1157 translation efficiency (blue) and highest translation efficiency (red) are indicated. **(F)** Histogram  
1158 of translation efficiency for the 100 genes with the lowest translation efficiency. An enrichment in  
1159 ribosomal proteins, indicated in blue, is observed. **(G)** Histogram of translation efficiency for the  
1160 100 genes with the highest translation efficiency. Genes in the most abundant functional class,  
1161 encoding proteins involved in cellular structure, are indicated in red. **(H)** Graph showing the 100  
1162 genes with the highest or lowest translation efficiency, their TE in Tor-OE as a ratio of wild type.  
1163 Note that the translational efficiency of ribosomal proteins in Tor-OE are significantly increased  
1164 compared to wild type. \*\*\*=p<0.001; paired Student's t-test. Additional details can be found in  
1165 Table S3, Table S4, and Figure S2.

1166

1167 **Fig 5: Transcriptional and translational profiling reveals expected changes in *GluRIIA***

1168 **mutants and Tor-OE. (A)** Schematic illustrating the genomic *GluRIIA* locus in wild type and

1169 *GluRIIA*<sup>SP16</sup> mutants. Note that the 5' region of *GluRIIA* is deleted in the *GluRIIA*<sup>SP16</sup> mutant, as

1170 well as the adjacent oscillin gene. **(B)** RNA-seq reads mapping to the *GluRIIA* locus from

1171 transcriptional and ribosome profiling in wild type and *GluRIIA*<sup>SP16</sup> mutants. The coverage

1172 graphs were divided into four sections corresponding to the regions indicated in the *GluRIIA*

1173 transcript. The numbers in each graph indicates the expression value of that region normalized

1174 to wild type transcriptional or ribosome profiling expression value. Note that no expression was

1175 detected by transcriptional or ribosome profiling in the deleted region in *GluRIIA* mutants, as

1176 expected. **(C)** Schematic illustrating the endogenous *Tor* mRNA transcript and the mRNA

1177 transcript encoded by Tor-OE. Both transcripts share the same coding sequence, but differ in

1178 their 5'UTR and 3'UTR sequences. Below are reads mapping to the indicated regions, divided

1179 into the three indicated sections. Note that both transcriptional and translational expression of

1180 *UAS-Tor* mRNA are significantly increased in Tor-OE, while transcription and translation of

1181 endogenous *Tor* mRNA are largely unchanged in Tor-OE.

1182

1183 **Fig 6: No changes in postsynaptic transcription or translation are observed in *GluRIIA***

1184 **mutants. (A)** Plot of transcriptional and translational levels of all expressed genes in *GluRIIA*

1185 mutants compared to wild type, with near identical correlations observed (indicated by  $r^2$

1186 values). **(B)** Plot of transcriptional and translational levels of all expressed genes in Tor-OE

1187 compared to wild type. Note that while moderate changes in transcription are observed, large

1188 differences in translation are found (indicated by  $r^2$  values). **(C)** Histogram of the distribution of

1189 gene translation fold change in wild type versus wild type (black), which represents intrinsic

1190 variability, and that of Tor-OE versus wild type (Red), and that of *GluRIIA* mutants versus wild

1191 type (blue). Note the shift in distribution observed in Tor-OE, suggesting a global increase in  
1192 translation. **(D)** Cumulative percentage plot of distributions shown in (C), showing significant  
1193 difference between Tor-OE versus wild type distribution compared to wild type versus wild type  
1194 distribution. ( $p < 0.001$ , Kolmogorov–Smirnov test). **(E)** Heat map showing the 46 genes with  
1195 significant increase in translation efficiency in Tor-OE, with the corresponding genes in *GluRIIA*  
1196 mutants shown below. Note that no trend is observed in translational expression changes in  
1197 these genes in *GluRIIA* mutants. Additional details can be found in Table S5.

1198

1199 **Fig 7: Increased cellular translation triggers adaptive cellular responses in both**  
1200 **transcription and translation. (A)** Diagram showing the number of significantly upregulated  
1201 genes in transcription and translation in Tor-OE compared to wild type. **(B)** Pie chart showing  
1202 the number of differentially upregulated genes in Tor-OE compared to wild type. **(C)** Graph  
1203 showing transcriptional and translational changes for chaperones significantly upregulated in  
1204 Tor-OE compared to wild type. Note that all but one exhibit higher translational changes  
1205 compared to transcriptional changes, implying an additional upregulation in translational  
1206 efficiency when compared to the increased transcriptional expression. Graph showing RPKM  
1207 values measured by transcriptional and ribosome profiling in wild type and Tor-OE for the  
1208 representative heat shock protein *Hsp23* **(D)**, the ubiquitin E3 ligase *APC4* **(E)**, the RNA  
1209 polymerase *Rpl1* **(F)**, and the transcription factor *myc* **(G)**. Read mapping of the indicated genes  
1210 are shown below. \*\*= $p < 0.01$ , \*\*\*= $p < 0.001$ ; Student's t-test. Additional details can be found in  
1211 Table S6.

1212

1213 **Fig S1: Rpl3-Flag localization in muscle and rescue of *RpL3* mutants. (A)** Schematic  
1214 illustrating the genomic *RpL3-3xflag* rescue construct and table showing lethal phase of *RpL3*  
1215 mutant (*w;RpL3*<sup>G13893/KG05440</sup>) and Rpl3-Flag rescue (*w;genomic-RpL3-3xflag/+*;

1216 *RpL3*<sup>G13893/KG05440</sup>). **(B)** Representative images of RpL3-Flag expressed in muscle (*w;BG57-*  
1217 *Gal4/UAS-RpL3-3xflag*) immunostained with anti-Flag (green) and anti-HRP (magenta)  
1218 antibodies.

1219

1220 **Fig S2: Functional classes for the 100 genes with the lowest and highest TE. (A)**

1221 Functional classes for the 100 genes with the lowest TE. Note that ribosomal proteins represent  
1222 the largest class, with 73 of the 100 genes encoding ribosomal proteins. **(B)** Functional classes  
1223 for the 100 genes with the highest TE. Diverse functional classes are present, with genes  
1224 encoding proteins involved in the cellular structure being the most abundant class.

1225

1226 **Table S1: Next generation sequencing data analysis statistics.**

1227

1228 **Table S2: Genes identified in the *Drosophila* third-instar larval transcriptome and**

1229 **translatome.** Genes in the transcriptome or translatome are defined by having at least 10  
1230 unique exon reads by transcriptional or ribosome profiling in all three replicates. Genes are  
1231 listed in the order of transcription (transcriptional profiling RPKM). Genes only found in the  
1232 transcriptome or translatome are listed at the end of the respective list.

1233

1234 **Table S3: Details on the 100 genes with the lowest translation efficiency.**

1235

1236 **Table S4: Details on the 100 genes with the highest translation efficiency.**

1237

1238 **Table S5: Details on the genes with significantly increased translation efficiency in Tor-**  
1239 **OE vs wild type.**

1240

1241 **Table S6: Genes significantly up-regulated in transcription or translation in Tor-OE vs**  
1242 **wild type.** Significantly up-regulated genes are defined by p-values<0.05 (see materials and  
1243 methods) and fold changes>3.

1244

1245

1246

1247

1248

1249

1250

1251

1252

1253



Figure 1

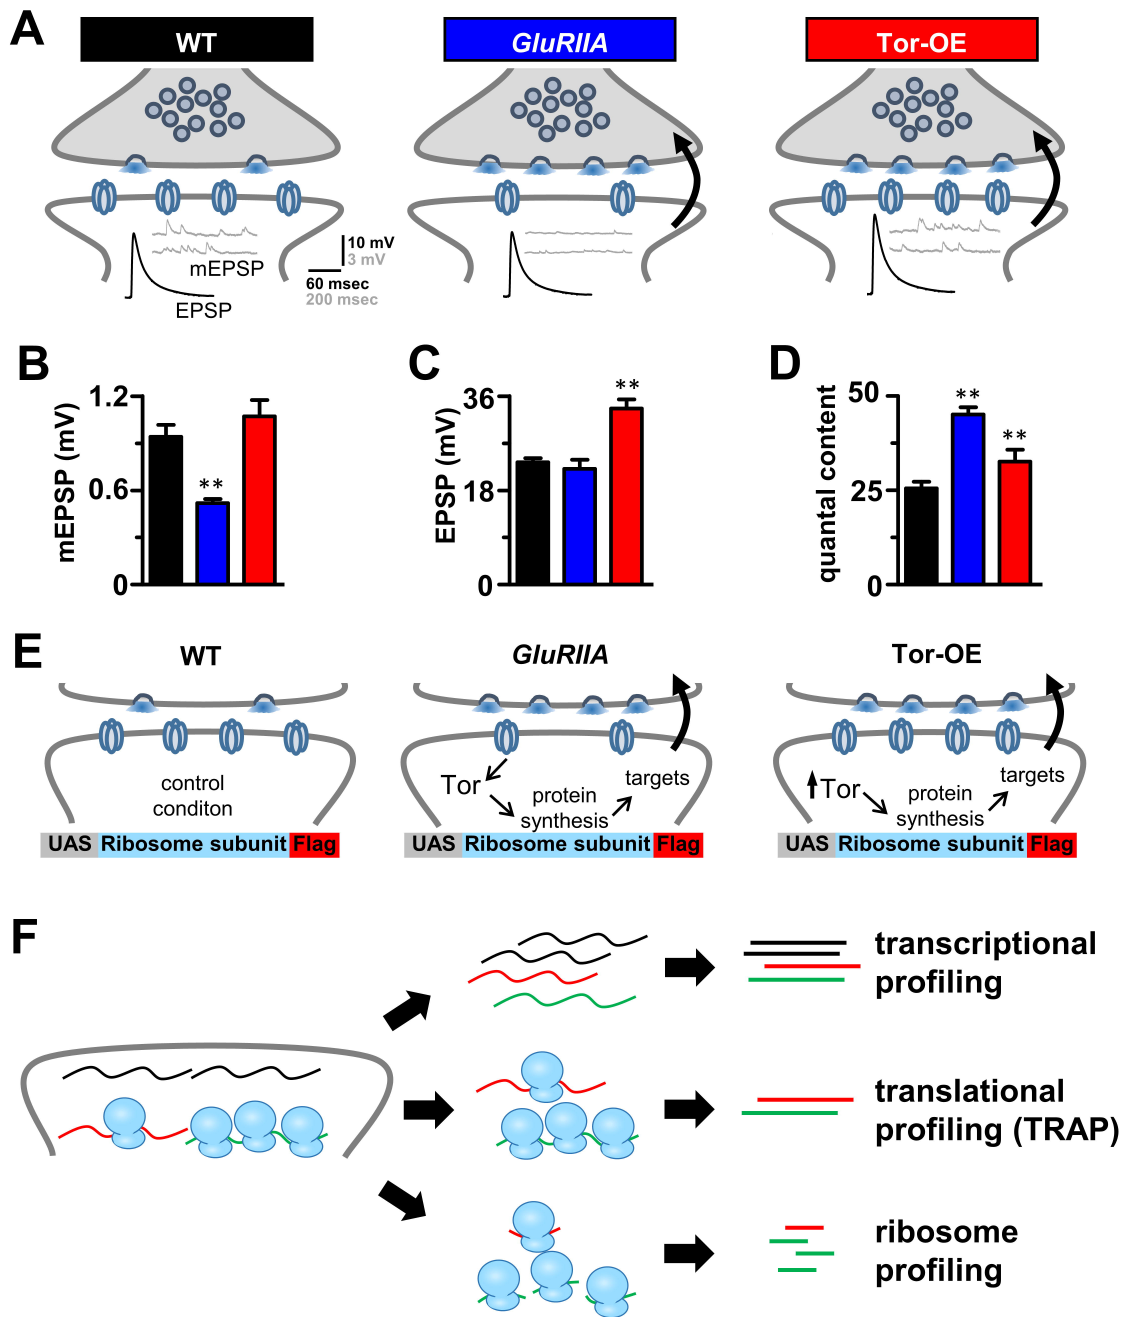

## Figure 2

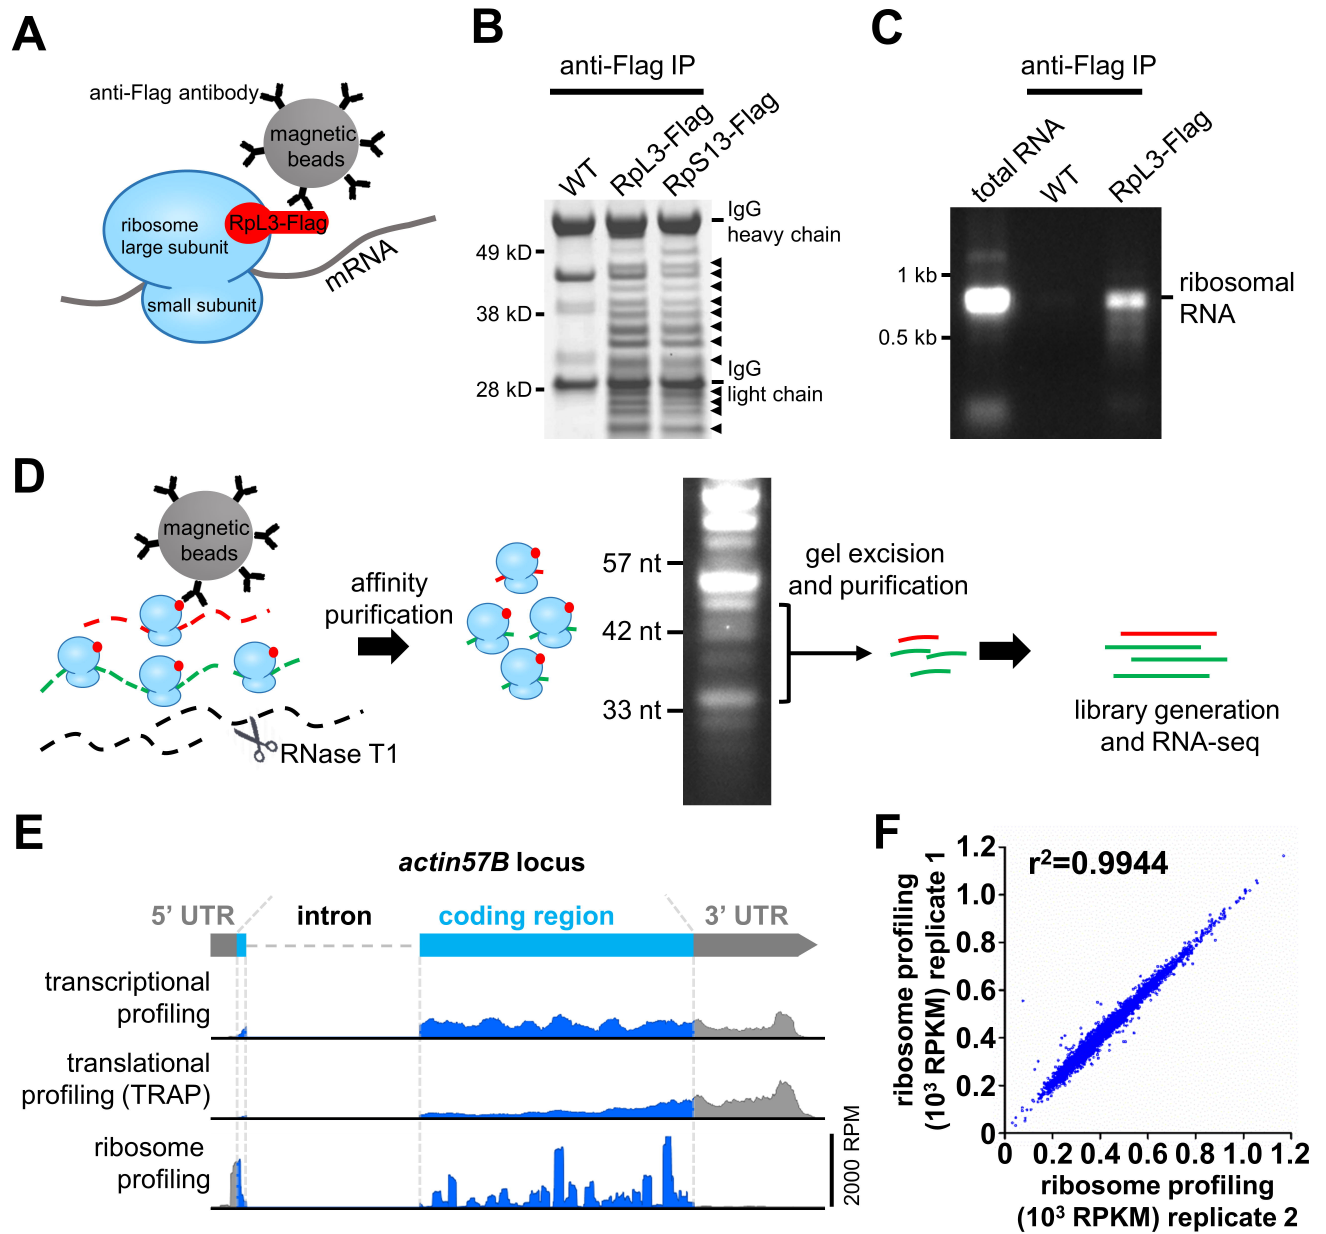

Figure 3

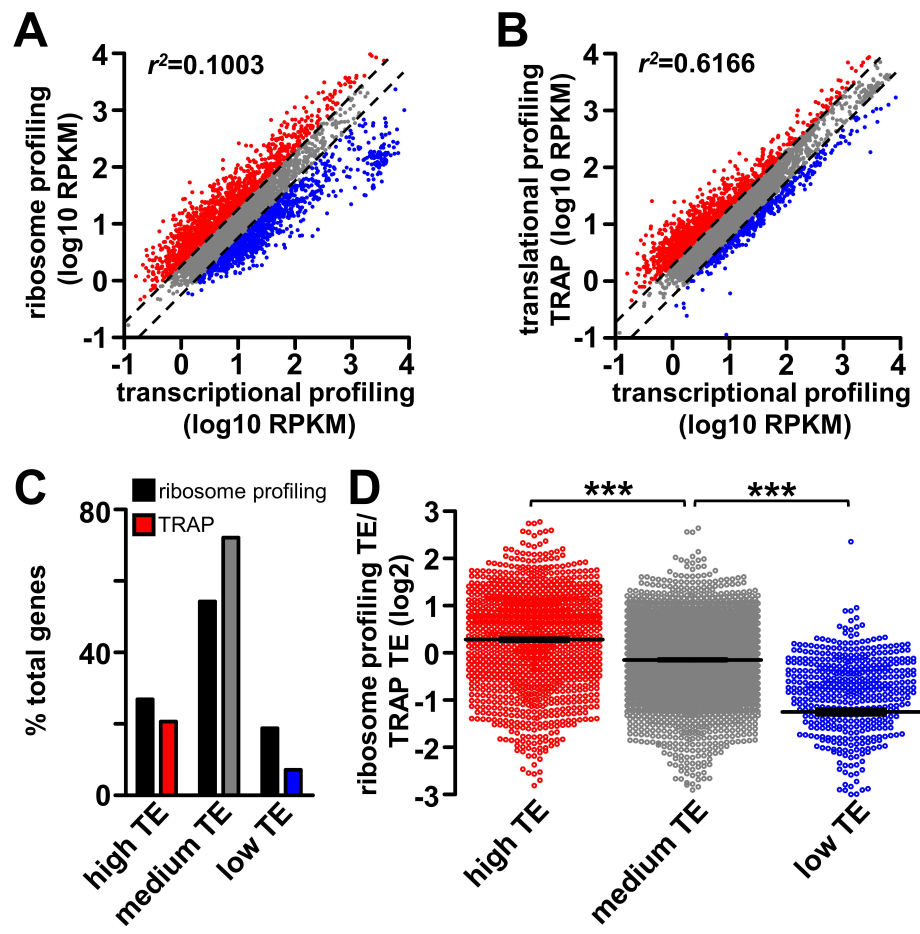

Figure 4

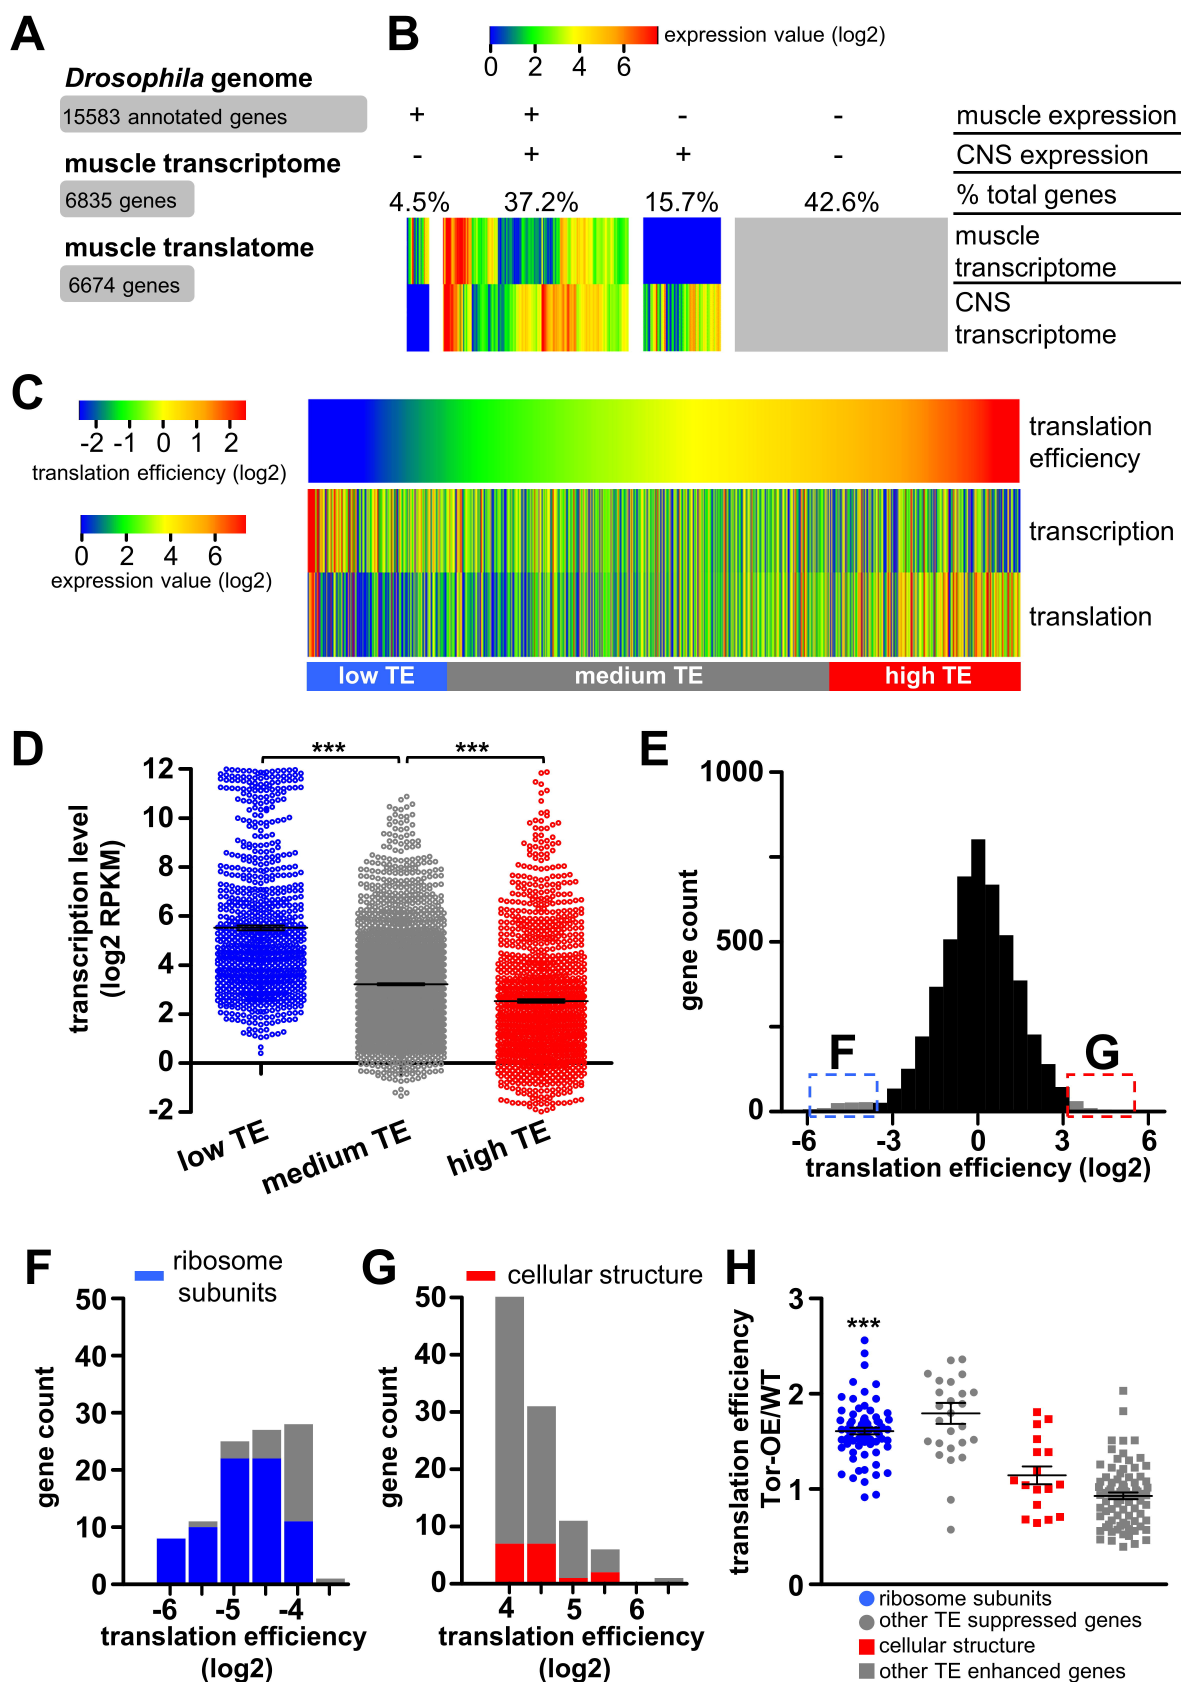

**Figure 5**

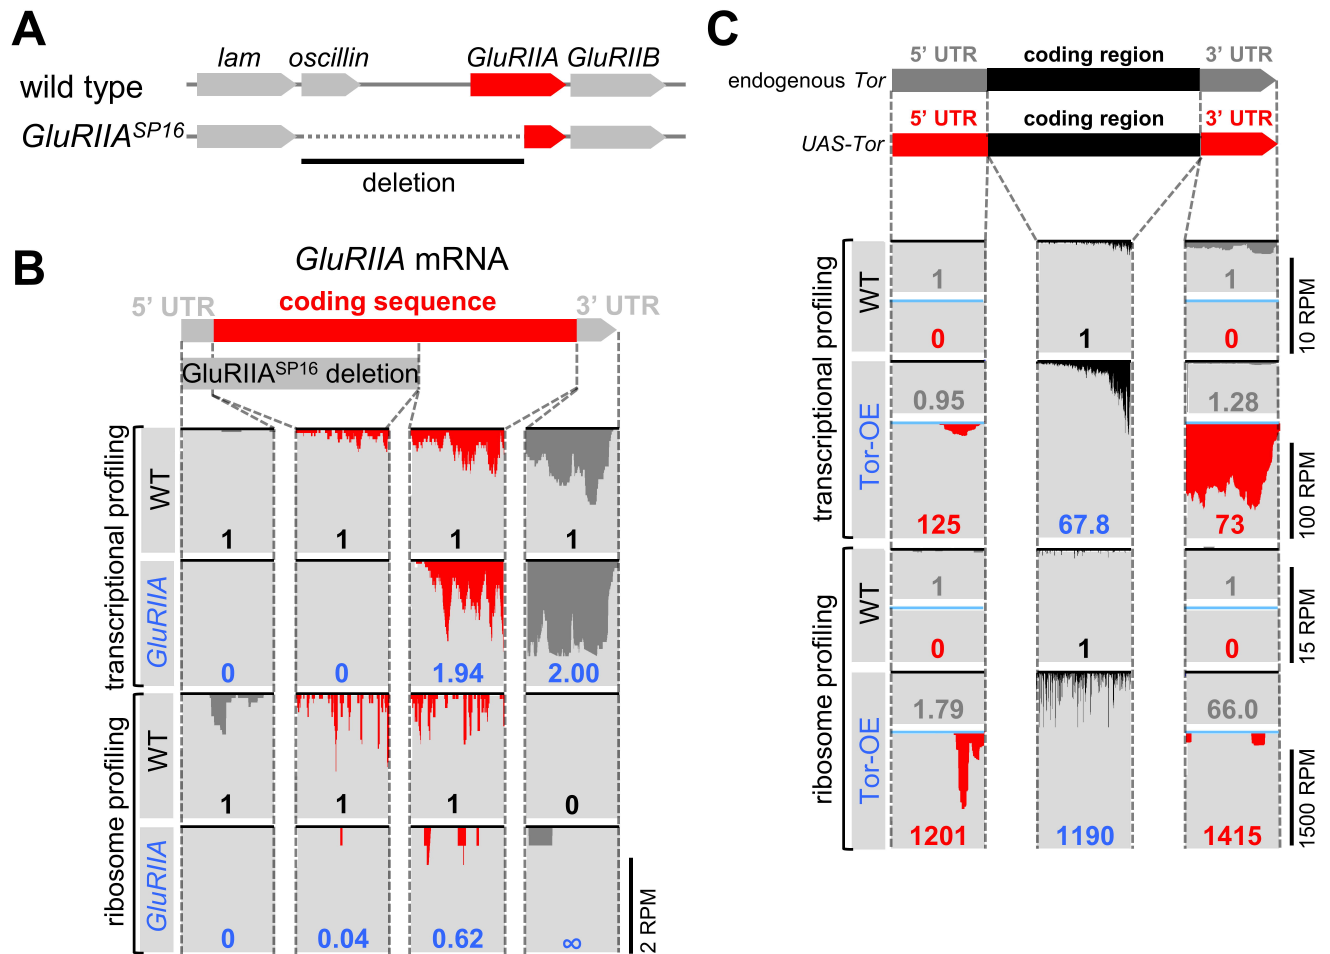

Figure 6

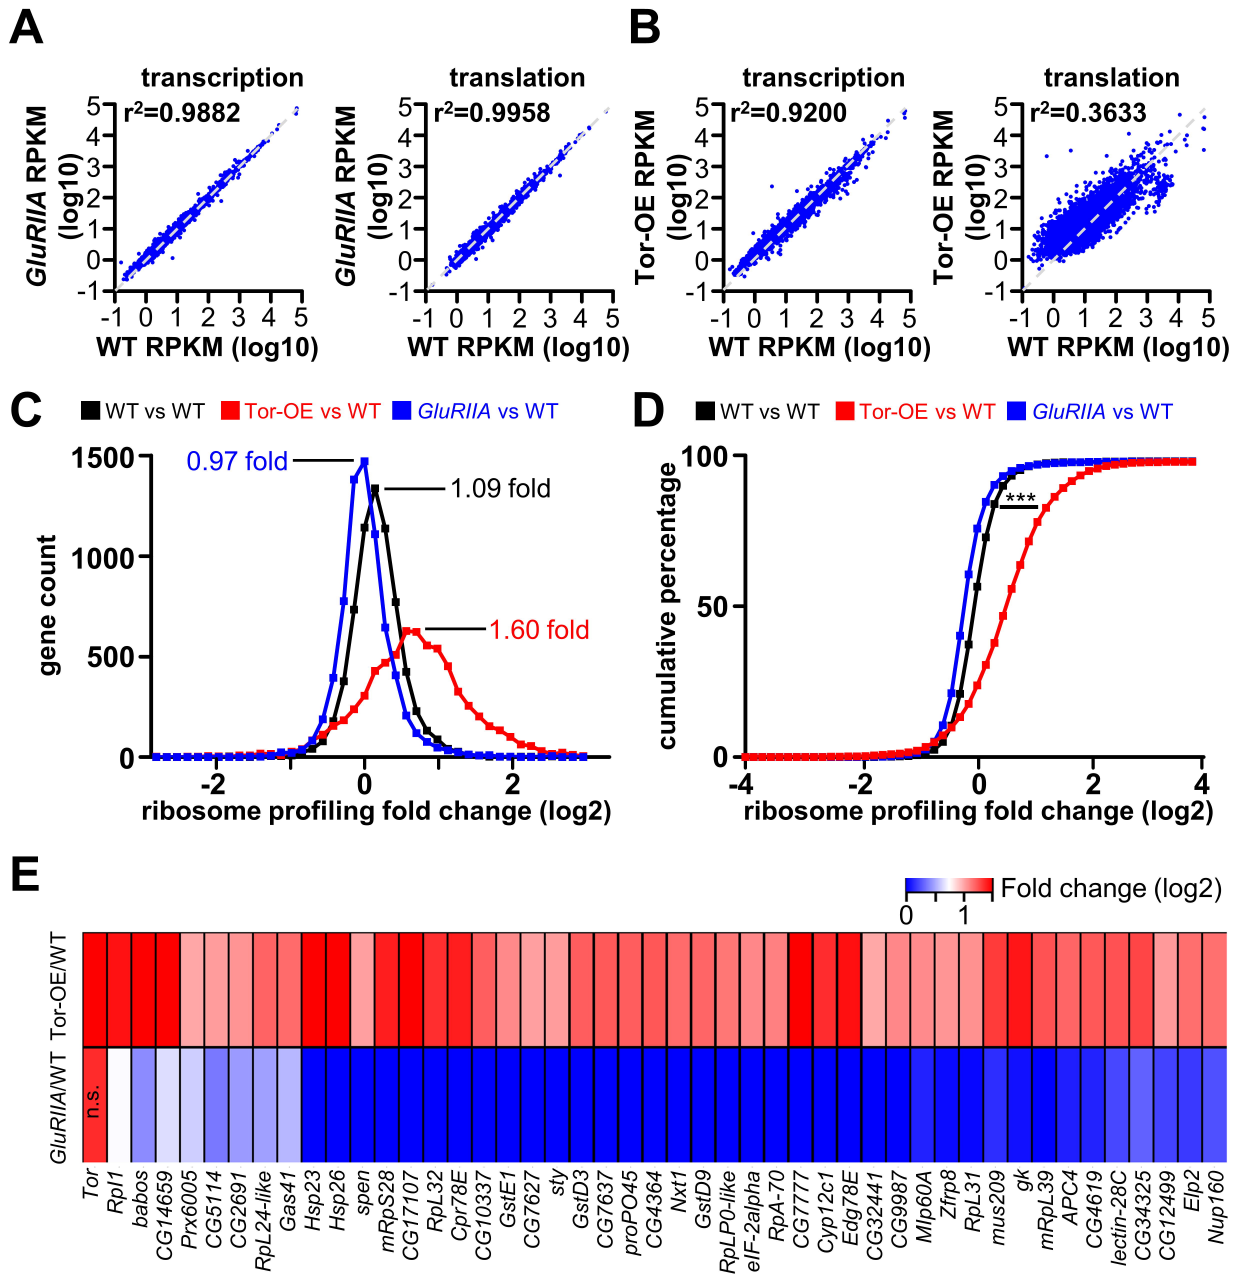

Figure 7

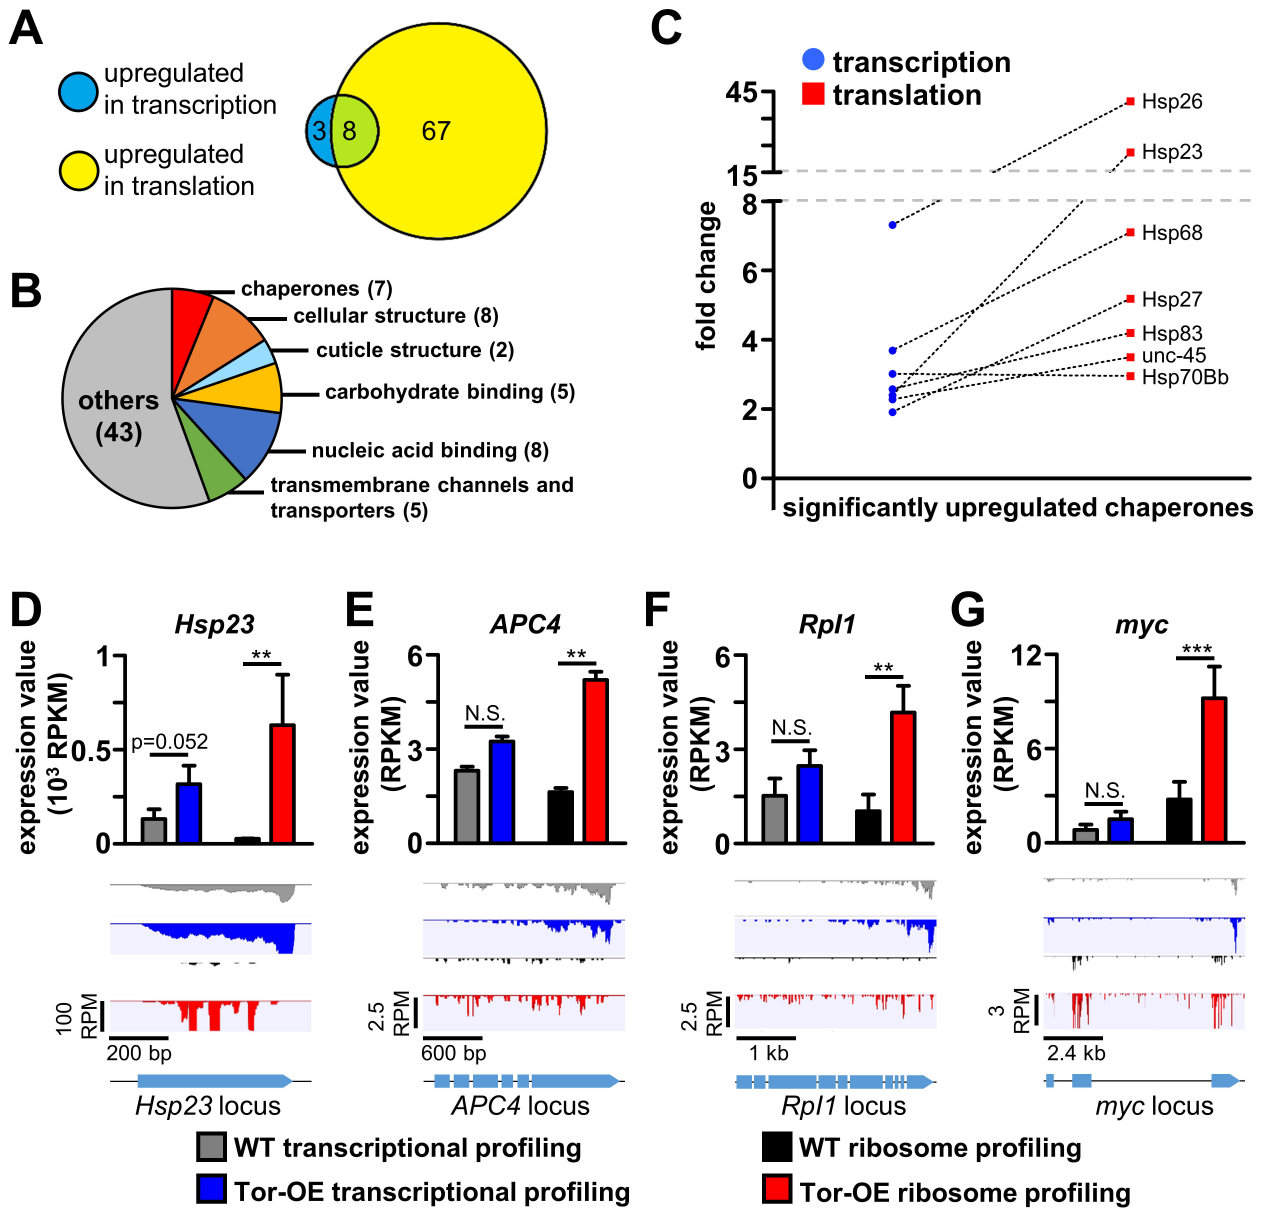

## Figure S1

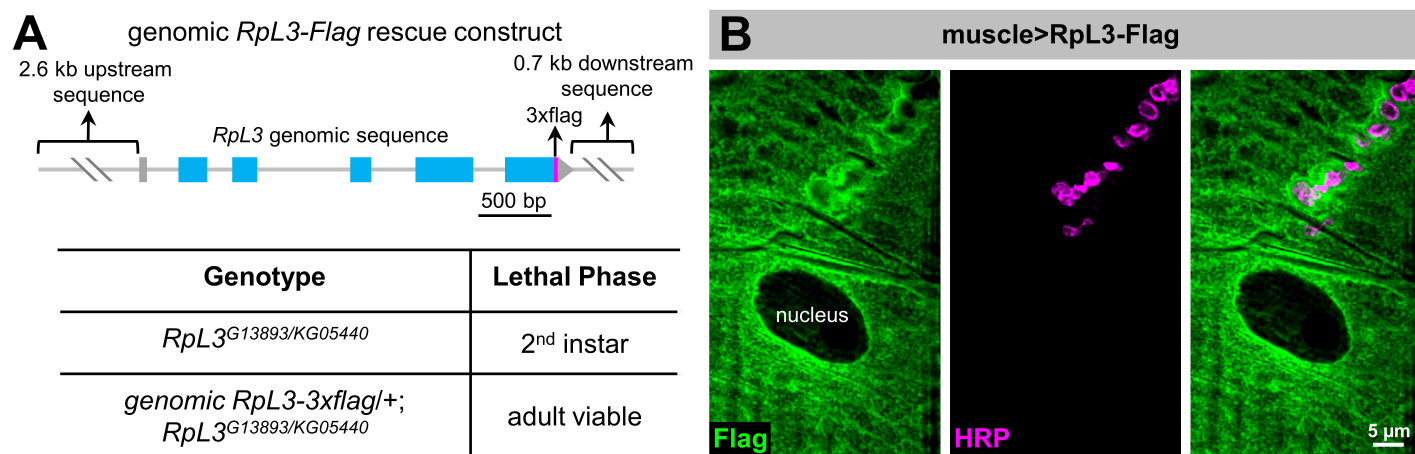



**Figure S2**

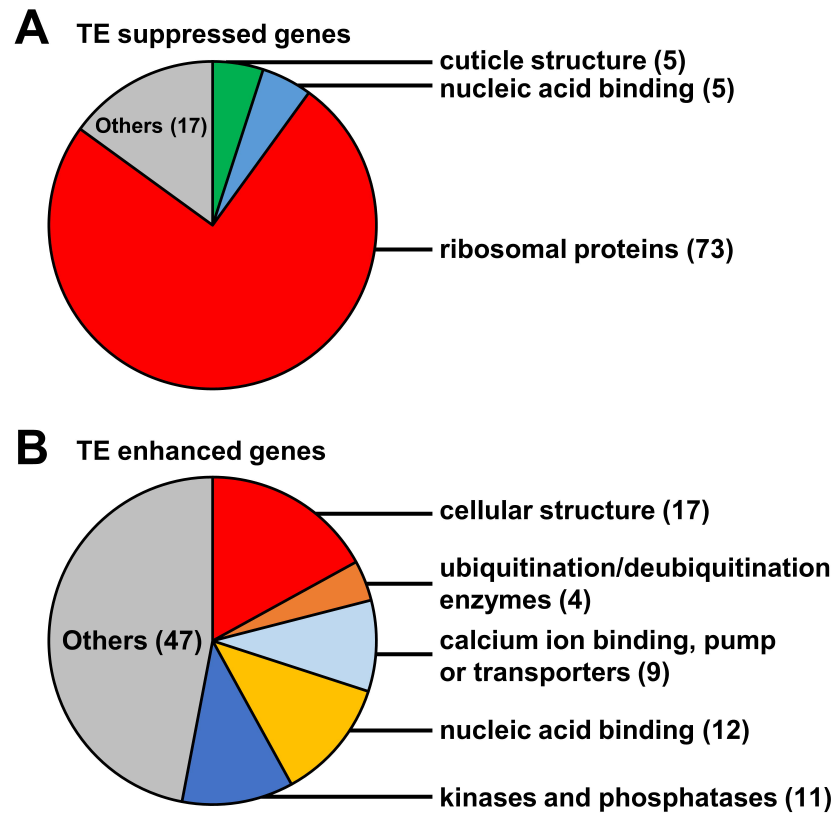

Source: http://www.biorxiv.org/content/10.1101/158303v1.full.pdf
